1 **A Cyclic Phosphoramidate Prodrug of 2'-deoxy-2'-fluoro-2'-C-methylguanosine for the**  
2 **Treatment of Dengue Infection**

3

4

5 Ratna Karuna<sup>a\*</sup>, Fumiaki Yokokawa<sup>a,b</sup>, Keshi Wang<sup>b\*</sup>, Jin Zhang<sup>c</sup>, Haoying Xu<sup>a\*</sup>, Gang Wang<sup>a\*</sup>,  
6 Mei Ding<sup>a\*</sup>, Wai Ling Chan<sup>a\*</sup>, Nahdiyah Abdul Ghafar<sup>a\*</sup>, Andrea Leonardi<sup>a\*</sup>, Cheah Chen Seh<sup>a\*</sup>,  
7 Peck Gee Seah<sup>at</sup>, Wei Liu<sup>a\*</sup>, Rao PS Srinivasa<sup>a,b</sup>, Siew Pheng Lim<sup>a\*</sup>, Suresh B  
8 Lakshminarayana<sup>a,b</sup>, Ellie Growcott<sup>b</sup>, Sreehari Babu<sup>d\*</sup>, Martijn Fenaux<sup>b\*</sup>, Weidong Zhong<sup>b\*</sup>,  
9 Feng Gu<sup>a,b</sup>, Pei-Yong Shi<sup>a\*</sup>, Francesca Blasco<sup>a\*</sup>, Yen-Liang Chen<sup>a,b#</sup>

10

11 <sup>a</sup>Novartis Institute for Tropical Diseases, Singapore

12 <sup>b</sup>Novartis Institutes for BioMedical Research, Emeryville, CA, USA

13 <sup>c</sup>Novartis Institutes for BioMedical Research, East Hanover, NJ, USA

14 <sup>d</sup>Novartis Global Drug Development, Shanghai, China

15 <sup>e</sup>Novartis Institutes for BioMedical Research, Cambridge, MA, USA

16

17 Running Head: Nucleoside dengue polymerase inhibitor

18 Keywords: dengue, nucleotide analog, monophosphate prodrug, cyclic phosphoramidate,  
19 nucleoside triphosphate, polymerase inhibitor

20

21 #Address correspondence to Yen-Liang Chen, [yen\\_liang.chen@novartis.com](mailto:yen_liang.chen@novartis.com)

22

23 \*Present addresses:

24 Ratna Karuna, Haoying Xu, Gang Wang: Experimental Drug Development Centre (EDDC);  
25 Agency for Science, Technology and Research (A\*Star), Singapore ([ratna\\_karuna@eddc.a-](mailto:ratna_karuna@eddc.a-star.edu.sg)  
26 [star.edu.sg](mailto:star.edu.sg); [xu\\_haoying@eddc.a-star.edu.sg](mailto:xu_haoying@eddc.a-star.edu.sg); [wang\\_gang@eddc.a-star.edu.sg](mailto:wang_gang@eddc.a-star.edu.sg))

27 Keshi Wang: Department of DMPK, Peloton Therapeutics, Inc., Dallas, TX  
28 ([keshi.wang@pelotontx.com](mailto:keshi.wang@pelotontx.com))

29 Mei Ding: Singapore Lipidomics Incubator, National University of Singapore  
30 ([Bchdim@nus.edu.sg](mailto:Bchdim@nus.edu.sg) )

31 Wai Ling Chan, Cheah Chen Seh: Tessa Therapeutics Pte. Ltd., Singapore  
32 ([chanwailing@tessatherapeutics.com](mailto:chanwailing@tessatherapeutics.com); [sehcheahchen@tessatherapeutics.com](mailto:sehcheahchen@tessatherapeutics.com))

33 Nahdiyah Abdul Ghafar: Tychan Pte. Ltd., Singapore ([Nahdiyahag@tychanltd.com](mailto:Nahdiyahag@tychanltd.com) )

34 Andrea Leonardi: Agilent Technologies, Singapore ([andrea.leonardi@agilent.com](mailto:andrea.leonardi@agilent.com))

35 Wei Liu: National Cancer Centre, Singapore ([liu.wei@nccs.com.sg](mailto:liu.wei@nccs.com.sg))

36 Siew Pheng Lim: Denka Life Innovation Research (DLIR), Singapore ([siewpheng-](mailto:siewpheng-lim@denka.com.sg)  
37 [lim@denka.com.sg](mailto:lim@denka.com.sg))

38 Sreehari Babu GVK Biosciences, Hyderabad, India ([sreeharibabu@outlook.com](mailto:sreeharibabu@outlook.com))

39 Martijn Fenaux, Weidong Zhong: Terns Pharmaceutical, San Mateo, CA  
40 ([mfenaux@ternspharma.com](mailto:mfenaux@ternspharma.com); [wzhong@ternspharma.com](mailto:wzhong@ternspharma.com))

41 Pei-Yong Shi: Department of Biochemistry and Molecular Biology, University of Texas Medical  
42 Branch, Galveston, TX ([peshi@UTMB.EDU](mailto:peshi@UTMB.EDU))

43 Francesca Blasco: Dr. Eckel Animal Nutrition GmbH&Co, Niedertzissen, Germany ([F.Blasco@dr-](mailto:F.Blasco@dr-)

44 [eckel.de](http://eckel.de))

45 † Deceased

46

47 **ABSTRACT**

48 Monophosphate prodrug analogs of 2'-deoxy-2'-fluoro-2'-C-methylguanosine have been  
49 reported as potent inhibitors of hepatitis C virus (HCV) RNA-dependent RNA polymerase. These  
50 prodrugs also display potent anti-dengue activities in cellular assays although their prodrug  
51 moieties were designed to produce high levels of triphosphate in the liver. Since peripheral blood  
52 mononuclear cells (PBMCs) are one of the major targets of dengue virus, different prodrug  
53 moieties were designed to effectively deliver 2'-deoxy-2'-fluoro-2'-C-methylguanosine  
54 monophosphate prodrugs and their corresponding triphosphates into PBMCs after oral  
55 administration. We identified a cyclic phosphoramidate prodrug **17** demonstrating a well-balanced  
56 anti-dengue cellular activity and *in vitro* stability profiles. In dogs, oral administration of **17**  
57 resulted in high PBMC triphosphate level, exceeding TP<sub>50</sub> (the intracellular triphosphate  
58 concentration at which 50% of virus replication is inhibited) at 10 mg/kg. Compound **17**  
59 demonstrated 1.6- and 2.2 log viremia reduction in the dengue mouse model at 100 and 300 mg/kg  
60 twice daily, respectively. At 100 mg/kg twice daily, the terminal triphosphate concentration in  
61 PBMCs reached above TP<sub>50</sub>, defining for the first time the minimum efficacious dose for a  
62 nucleos(t)ide prodrug. In the two-week dog toxicity studies at 30 to 300 mg/kg/day, no observed  
63 adverse effect level (NOAEL) could not be achieved due to pulmonary inflammation and  
64 hemorrhage. The preclinical safety results suspended further development of **17**. Nevertheless,  
65 present work has proven the concept that an efficacious monophosphate nucleoside prodrug could  
66 be developed for the potential treatment of dengue infection.

## 67 INTRODUCTION

68 The mosquito-borne dengue virus is endemic to tropical and sub-tropical regions  
69 throughout the world, making dengue fever the most important mosquito-borne viral disease  
70 afflicting humans. Its global distribution is comparable to that of malaria, with an estimated 2.5  
71 billion people at risk for epidemic transmission (1). There has been steady increases in countries  
72 affected and incidence since the 1950s and recent estimates suggest annual rates of 390 million  
73 cases accompanied by 20,000 deaths (2).

74 Dengue viruses (DENVs) can be further classified into four different serotypes (DENV-1  
75 to -4), all of which can lead to disease symptoms with varying severity. Secondary infection by a  
76 different serotype may increase the risk of severe dengue diseases. While diagnosis of dengue  
77 infection can be rapid and simple, serotype distinction requires additional instrumentation, usually  
78 in a laboratory setting. Thus, the ideal treatment for dengue fever should possess pan-serotype  
79 activities (3). Recently, a dengue vaccine was approved in certain countries but is recommended  
80 only for individuals with prior DENV exposure. This limits its use as well as necessitating pre-  
81 vaccination screening (4). No antivirals are currently available for the treatment of dengue.

82 DENV is an enveloped, positive strand RNA virus belonging to the *Flaviviridae* family  
83 and the genus *Flavivirus*. Medically important viruses in this class include Yellow Fever virus  
84 (YFV), Japanese encephalitis virus (JEV), West Nile virus (WNV), and Zika virus (ZIKV). The  
85 dengue viral genome encodes three structural (C-prM-E) and seven nonstructural (NS1-NS2A-  
86 NS2B-NS3-NS4A-NS4B-NS5) proteins. The nonstructural protein NS5 contains both  
87 methyltransferase and RNA-dependent RNA polymerase (RdRp) activities. The RdRp is a viral  
88 specific enzyme which catalyzes the replication of viral RNA from its own complementary  
89 template. It is essential for viral replication and an attractive target for therapeutic intervention (5).

90 Nucleoside/Nucleotide analogs are a highly successful compound class of antivirals, as  
91 exemplified in the treatment of human immunodeficiency virus (HIV), herpes simplex virus  
92 (HSV), hepatitis B virus (HBV), and hepatitis C virus (HCV) (6). These inhibitors are converted  
93 to their active nucleoside triphosphate forms by host-cell machinery and inhibit the synthesis of  
94 viral RNAs or DNAs by acting as ‘chain terminators’ or substrate mimics (7). Because the  
95 modified nucleoside triphosphates must be recognized by the highly conserved active site of  
96 DENV polymerase, they have a high likelihood of pan-DENV serotype activity and a high barrier  
97 to drug resistance (8). These features make them very attractive for dengue drug development (9).  
98 We previously reported an adenosine-based nucleoside (Fig. 1A, NITD-008 (**1**), 7-deaza-2’-C-  
99 ethynyl-adenosine) which potently inhibited DENV both *in vitro* and *in vivo*. However, the  
100 development of NITD-008 was terminated due to insufficient safety profile (10). 4’-azido-cytidine  
101 (R-1479 (**2**)) and its ester prodrug, balapiravir (**3**) (Fig. 1A), were originally developed for the  
102 treatment of HCV, but their development were terminated due to hematologic adverse events such  
103 as lymphopenia (11). Azido-cytidine (**2**) was weakly active against dengue (12) and Balapiravir (**3**)  
104 failed to reduce viral load in dengue patients (13).

105 It is not uncommon that many nucleoside analogs suffer the lack of biological activities in  
106 cellular assays due to poor intracellular conversion to their triphosphates. In particular, conversion  
107 of nucleoside analogs into their nucleotide or nucleoside monophosphate is often rate-limiting or  
108 non-productive (14). On the other hand, the unprotected monophosphate species are poor drug  
109 candidates as they have inadequate cellular permeability due to the inability of negatively charged  
110 phosphates to cross the cell membrane. To circumvent the problem, the monophosphate prodrug  
111 approach has been developed to deliver the nucleoside monophosphate directly into target cells  
112 (15). This prodrug approach has proven to be effective in improving the therapeutic potential of

113 antiviral and anticancer nucleosides (16). For instance, the uridine-based monophosphate prodrug  
114 sofosbuvir is a key component in a number of HCV combination therapies (17). The excellent  
115 efficacy of sofosbuvir is due to the efficient delivery of the nucleoside triphosphate into the target  
116 organ, liver (18).

117 Similarly, prodrugging nucleotides to deliver a high level of active triphosphates into  
118 PBMCs as has been successfully demonstrated in tenofovir and GS-5734 (19) alafenamide (20)  
119 for the treatment of HIV and Ebola virus, respectively. Due to the ester moiety, rapid elimination  
120 of the prodrug was observed. However, GS-5734 was also rapidly distributed into PBMCs and the  
121 corresponding triphosphate level reached maximum of 2 hours in PBMC (19). The prodrug  
122 tenofovir alafenamide was only transiently present in plasma ( $T_{1/2}$  ~30 min) when dosed orally to  
123 dogs. However, the exposure was sufficient to drive a high and sustained level of the active  
124 metabolite in PBMCs (20).

125 In 2010, Pharmasset (acquired by Gilead in 2012) reported two nucleotide prodrugs of 2'-  
126 deoxy-2'-fluoro-2'-C-methylguanosine, PSI-352938 (**4**) (21, 22) and PSI-353661 (**5**) (23) as  
127 potent inhibitors of HCV replication (Fig. 1A). Their common guanosine-based nucleoside  
128 triphosphate **6** was reported to be a potent inhibitor of HCV NS5B polymerase with  $IC_{50}$  value of  
129 5.94  $\mu$ M. We evaluated these prodrugs and the active triphosphate in our PBMC dengue plaque  
130 and dengue RdRp enzyme assays, respectively. We subsequently embarked on the optimization of  
131 the prodrug moieties to deliver the active triphosphate **6** into peripheral blood mononuclear cells  
132 (PBMCs), one of the major dengue replication sites (24).

133 Herein we report our research leading to a cyclic phosphoramidate prodrug of 2'-deoxy-  
134 2'-fluoro-2'-C-methylguanosine for the treatment of dengue starting from the liver-targeting  
135 prodrugs. The optimized prodrug **17** resulted in high triphosphate loading in PBMCs after oral

136 administration in dogs. In addition, compound **17** demonstrated oral efficacies at 100 mg/kg twice  
137 daily in the dengue mouse model with high triphosphate concentration in PBMCs, while the liver-  
138 targeting prodrug **5** failed to reduce viremia at an even higher dose. Based on the correlation of the  
139 triphosphate levels in PBMCs and *in vivo* efficacy, we defined the minimum efficacious dose for  
140 a nucleoside/nucleotide prodrug. We also described the *in vitro* and *in vivo* preclinical  
141 characterization of **17** as well as the development work towards safety assessment.



## 142 MATERIALS AND METHODS

### 143 Material

144 All nucleoside/nucleotide compounds were synthesized at Novartis Institute for Tropical  
145 Diseases (NITD) as described in the main text. The solid dispersion batch of compound **17** was  
146 manufactured by the Chemical and Pharmaceutical Profiling (CPP) unit of Novartis in Shanghai,  
147 China. The solid dispersion formulation consisted of 20% (w/w) active ingredient, 40% (w/w)  
148 hypromellose acetyl succinate (HPMC-ASLF, Shin-Etsu Chemical, Tokyo, Japan), 35% (w/w),  
149 hypromellose (HPMC-E3, Shin-Etsu Chemical, Tokyo, Japan) and 5% (w/w) sodium lauryl sulfate  
150 (SLS, Sigma-Aldrich, St. Louis, MO). The analytical standard for triphosphate measurement, 8-  
151 Bromoadenosine 5'-triphosphate (Br-ATP), and ion-pairing reagent hexylamine were from Sigma-  
152 Aldrich. Acetonitrile and ammonium acetate used for LC-MS/MS mobile phases were from Merck  
153 (Darmstadt, Germany). All other solvents, reagents, and chemicals were either of molecular  
154 biology grade or of the highest chemical grade available from Sigma-Aldrich or Thermo Fisher  
155 Scientific (Waltham, MA) unless otherwise mentioned.

156 Different species of pooled liver S9 fraction (Gentest™, Corning, NY) and intestinal S9  
157 fraction (XenoTech, Kansas City, KS) were of mixed gender for human and male for all other  
158 species. Co-factor NADPH is from Sigma-Aldrich (St. Louis, MO). Different species of plasma  
159 were all mixed genders and obtained from Seralab (West Sussex, UK). Cryopreserved human  
160 PBMCs (individual donors) were purchased from AllCells (Alameda, CA) or ReachBio (Seattle,  
161 WA). Written consent from the donors was available for all samples. All experiments involving  
162 human matrices were approved by the Institutional Review Board of Novartis prior to the start of  
163 the experiments. PBMCs from other species (pooled) were from 3H Biomedical (Uppsala,

164 Sweden). C6/36, THP-1, KU812, K562, 293T and BHK-21 were from American Type Culture  
165 Collection (ATCC, Manassas, VA).

166 Vacutainer® CPT™ (Cell Preparation Tube with sodium citrate, 4 ml draw capacity) was  
167 from BD Biosciences (Franklin Lakes, NJ). The collagen I coated plates were from Thermo Fisher  
168 Scientific. HEPES buffer, RPMI 1640 medium, penicillin-streptomycin were from Life  
169 Technologies (Carlsbad, CA). PhosSTOP (phosphatase inhibitor) and protease inhibitor cocktail  
170 (cOmplete™) tablets were from Roche Applied Science (Penzberg, Germany).

### 171 **Stability in plasma, liver and intestinal S9**

172 Frozen pooled plasma (K<sub>3</sub>EDTA) was thawed from -20°C and centrifuged at 2643 × g for  
173 5 minutes (min) at ambient temperature and any hemin plug was discarded. Plasma was then  
174 diluted in Dulbecco's phosphate buffer saline (PBS) to achieve 50% concentrated solution with  
175 nominal pH of ~7.4±1. A pre-warmed diluted plasma and compound in methanol (1 µM final  
176 concentration) was briefly vortexed at time point zero. Incubation was performed in a shaking  
177 water bath (37°C) and subsequent time points were taken (5, 15, 30, 60, 120 min). Samples were  
178 quenched with 4 volumes of ice-cold acetonitrile (containing internal standard), centrifuged, and  
179 supernatant analyzed by LC-MS/MS. Half-life ( $t_{1/2}$ ) was then calculated from the parent depletion.

180 Frozen pooled liver or intestinal S9 fraction was thawed from -20°C and diluted in PBS  
181 with NADPH (1 mM final concentration) to 2 mg/ml. The PBS was pre-warmed at 37°C for 10  
182 min. The reaction was initiated by addition of compound in methanol (1 µM final concentration).  
183 The sample plates were incubated on a shaker (37°C). Sequential samples were removed at  
184 designated time points (0, 5, 15, 30, 60, 120 min) and quenched with 4 volumes of ice-cold  
185 acetonitrile (containing internal standard), centrifuged and supernatant reconstituted in water

186 (acetonitrile:water, 1:1 v/v). Samples were then analyzed by LC-MS/MS and half-life ( $t_{1/2}$ ) was  
187 obtained.

188 For all *in vitro* stability assays, a generic LC-MS/MS method was used to assess parent  
189 depletion. Briefly, separation was performed on a 50 x 2 mm, 4 micron, Synergy Polar-RP column  
190 (Phenomenex, Torrance, CA) using a fast gradient elution of 400  $\mu$ l per minute (5% to 95% B in  
191 0.8 min and kept at 95% B for another 1.6 min). Mobile phase was 0.1% formic acid in water (A)  
192 or acetonitrile (B). Detection was performed using TSQ Quantum™ Discovery Max (Thermo  
193 Fisher Scientific) with electrospray ionization (ESI) in positive mode. Stability was determined  
194 semi-quantitatively from the peak area ratios of analyte:internal standard (diazepam) and half-life  
195 ( $t_{1/2}$ ) was calculated based on the rate of compound depletion.

#### 196 ***In vitro* antiviral assays**

197 Antiviral assays in PBMCs were performed as previously described (12). Briefly,  
198 cryopreserved PBMCs were thawed according to the manufacturer's instruction and re-suspended  
199 in RPMI medium supplemented with 1% penicillin-streptomycin solution. The DENV was pre-  
200 incubated with 0.38  $\mu$ g/ml chimeric 4G2 antibody for 30 min at 4°C to form a virus-antibody  
201 complex before it was added to the PBMCs at multiplicity of infection (MOI) of 1. The plate was  
202 further incubated at 37°C for 1 hour before addition of serially diluted compounds. The viral titers  
203 in the culture fluids were quantified using a plaque assay at 48 hour post-infection. EC<sub>50</sub> was  
204 calculated by Prism (GraphPad Software, La Jolla, CA) using the equation for a sigmoidal dose-  
205 response (variable slope).

206 Huh-7 dengue replicon assay was previously described (25). For 293T dengue plaque  
207 assay, 3 X 10<sup>4</sup> cells were seeded in a 96-well collagen I coated plate in 100  $\mu$ l of media (DMEM  
208 supplemented with 10% fetal bovine serum and 1% penicillin-streptomycin) one day prior to

209 infection. The media was removed and the cells were infected with the virus-antibody complex  
210 with MOI of 3 in the same media without serum for 1 hour at 37°C. The media was then removed  
211 and replaced with DMEM media supplemented with 2% fetal bovine serum and 1% penicillin-  
212 streptomycin for another 2 days. The EC<sub>50</sub> was calculated using a plaque assay as described before.  
213 THP-1 and KU812 assays were performed as described in the publications (26). Cytotoxicity assay  
214 was also performed as previously described (27). K562 assay was performed similarly with the  
215 MOI of 1.

216 RdRp assay was conducted as previously described (12). Briefly, a 244-nucleotide RNA  
217 with the sequence 5'-(TCAG)<sub>20</sub>(TCCAAG)<sub>14</sub>(TCAG)<sub>20</sub>-3' was used as a template (28).  
218 Compounds with various concentrations were mixed with the RNA template (100 nM), dengue  
219 RdRp (100 nM), 0.5 μM of BBT-GTP and 2 μM of ATP, CTP and UTP in the buffer containing  
220 50 mM Tris HCl pH 7.5, 10 mM KCl, 0.5 mM MnCl<sub>2</sub> and 0.01% Triton X-100 for 120 minutes.  
221 The amount of substrate produced and IC<sub>50</sub> was determined as described in the publication (29).

## 222 ***In vitro* triphosphate conversion studies in PBMCs**

223 Cryopreserved PBMCs were thawed and incubated in RPMI medium containing 2% fetal  
224 bovine serum, 1% penicillin-streptomycin, and a designated concentration of the prodrug. After  
225 the intracellular conversion into corresponding triphosphate reached steady state (24 hours at 37°C  
226 in the incubator), the cells were spun down for 10 min (ambient temperature, 135 × g) and washed  
227 with cold 0.9% NaCl solution in 1 mM HEPES. The wash buffer was carefully removed with a  
228 micropipette and cell lysis carried out before compound measurement.

229 For investigating the triphosphate conversion kinetic, a sequential time points were taken  
230 (0, 3, 7, 24, 48 hours) upon prodrug incubation in human PBMCs. For half-life experiment,  
231 compound **12** (100 μM) was incubated in human PBMCs for 24 hours, the media was replaced

232 with fresh media without compounds and time points were subsequently taken (0, 2, 4, 8, 24, 32,  
233 48 hours).

#### 234 **TP<sub>50</sub> determination**

235 TP<sub>50</sub> is defined as the intracellular triphosphate concentration at which 50% of the virus  
236 replication is inhibited. Due to analytical sensitivity, direct measurement of the triphosphate  
237 concentration at the EC<sub>50</sub> of the prodrug was challenging. Hence, the TP<sub>50</sub> was derived using  
238 Michaelis-Menten kinetic with increasing prodrug concentrations in human PBMCs (12). Briefly,  
239 cryopreserved human PBMCs were incubated with compound **17** (3, 10, 30 100 μM). The cells  
240 were prepared and lysed and the PBMC triphosphate was analyzed by LC-MS/MS as described in  
241 other parts of this Method section. The intracellular triphosphate concentrations were plotted  
242 against the prodrug concentrations used in the incubation. TP<sub>50</sub> was derived using Michaelis-  
243 Menten kinetic with the formula of  $Y = A[X]/B + [X]$ , where  $Y$  is the triphosphate concentration,  
244  $A$  is the calculated maximum triphosphate concentration extrapolated from the graph,  $[X]$  is the  
245 prodrug concentration, and  $B$  is the calculated prodrug concentration at which its triphosphate  
246 reached half of its maximal value.

#### 247 **PBMC lysis**

248 Cell lysis buffer containing 50 mM Tris-HCl at pH 7.5, 150 mM NaCl, 1% IGEPAL® CA-  
249 630, 1 mM phenylmethane sulfonyl fluoride (PMSF), 1 × protease inhibitor stock solution  
250 (Roche), and 1 PhosSTOP tablet was freshly made in 10 ml solution and used within 2 hours. The  
251 50 × protease inhibitor stock solution was made by dissolving one protease inhibitor cocktail tablet  
252 in 1 ml water. For rodent PBMCs, the concentration of protease inhibitor was increased five-fold  
253 to ensure the stability of the triphosphate in the lysate.

254 PBMCs were lysed by adding cell lysis buffer at 10 million cells/ml and incubated at room  
255 temperature for 10 min. The cell debris was then spun down at  $15,800 \times g$  for 20 min ( $4^{\circ}\text{C}$ ). The  
256 lysate was transferred into new tubes, snapped frozen in liquid nitrogen and stored at  $-80^{\circ}\text{C}$  until  
257 triphosphate LC-MS/MS analysis.

## 258 **PBMC isolation from *in vivo* studies**

259 To increase sensitivity of triphosphate detection, PBMCs were lysed at the concentration  
260 of 30 million cells/ml from each dog or pooled AG129 mice. To obtain PBMCs from animals,  
261 blood was drawn from the animals to Vacutainer® CPT™ tubes at indicated time points. The CPT  
262 tubes were centrifuged at ambient temperature for 20 min ( $1500 \times g$ ). A whitish layer (PBMCs)  
263 under plasma layer was pipetted into a 15 ml conical centrifuge tube. PBS (10 ml) was added and  
264 the mixture was centrifuged at ambient temperature for another 10 min ( $700 \times g$ ). The plasma  
265 supernatant was then carefully aspirated using a vacuum pump while ensuring the PBMC pellet  
266 remained at the bottom of the tube. The pellet was then resuspended with PBS (1 ml) and vortexed  
267 at the lowest setting. The suspension was transferred to an Eppendorf tube and lysed as described  
268 above. The blood was processed immediately to ensure minimum degradation of the triphosphate.  
269 The samples (cell lysate) were stored or shipped in  $-80^{\circ}\text{C}$  for triphosphate LC-MS/MS analysis.

## 270 **LC-MS/MS analysis**

271 Methods with slight variation were used for the multiple studies conducted at different  
272 sites. The basic principles of all the methods used were similar and comparable results were  
273 obtained. The intact prodrugs and free nucleoside metabolite **7** in plasma were measured after  
274 protein precipitation followed by reversed-phase liquid chromatography (LC) and tandem mass  
275 spectrometry (MS/MS) with ESI in positive mode. The intracellular triphosphate **6** analysis was

276 carried out after protein precipitation of the PBMC cell lysate, ion-pairing to retain the triphosphate  
277 on a reversed-phase LC column, and MS/MS with ESI in negative mode.

278 Analysis was most challenging in the rodent matrix due to the *ex-vivo* instability of the  
279 intact prodrug in plasma and triphosphate in cell lysate. The methods used were as follows. For  
280 the intact prodrug and metabolite **7**, an inhibitor cocktail of NaF and citric acid (20 mM NaF and  
281 40 mM citric acid final concentration) was added to the blood collection tubes. Plasma was  
282 obtained by centrifuging the blood for 5 min (4°C) at 10,000 × *g*. 175 µl extraction solution mixture  
283 (acetonitrile:methanol:acetic acid, 90:10:0.2 v/v) containing a generic internal standard (warfarin)  
284 was added to 25 µl plasma. The sample plates were shaken and then centrifuged for 10 min (4°C,  
285 2884 × *g*). The supernatant was collected and 5 µl was injected to the LC-MS/MS system. Mobile  
286 phase was 20 mM ammonium acetate + 1% acetic acid (A) or in 100% acetonitrile (B). Gradient  
287 elution was performed on a Hydro-RP column (100 × 3 mm, 2.5 micron, Phenomenex, Torrance,  
288 CA) at 600 µl/min: 0% to 80% B in 2 min and kept at 80% B for another 1.5 min. MS/MS detection  
289 was performed with 4000 QTRAP® (Sciex, Framingham, MA). MRM transition of 489.4/310.2  
290 and 300.3/152.1 were used for prodrug **17** and metabolite **7**, respectively. Calibration and quality  
291 control (QC) samples used matched-matrix (e.g. naïve AG129 mouse plasma) and the lower limit  
292 of quantification (LLOQ) obtained was 15.75 nM for both analytes.

293 For PBMC triphosphate analysis, a higher concentration of protease inhibitor cocktails was  
294 used during cell lysis of rodent samples (see PBMC lysis section). An equal amount of  
295 acetonitrile:water mixture (1:1) containing internal standard (Br-ATP) was added to the cell lysate.  
296 The mixture was vortexed and centrifuged (1,431 × *g* at ambient temperature) for 10 min. The  
297 supernatant (5 µl) was then injected to the LC-MS/MS system (4000 QTRAP®, Sciex,  
298 Framingham, MA). Ion-pair chromatography was used for separation on a 5 × 2 mm, 3 micron,

299 Gemini-NX column (Phenomenex, Torrance, CA). Mobile phase A and B was water and  
300 acetonitrile mixture, respectively, containing 5 mM ammonium acetate and 5 mM hexylamine,  
301 buffered at pH 8.5. Gradient elution (700  $\mu$ l/min) was achieved with 5% to 60% mobile phase B  
302 within 3.5 min. Detection was in negative mode with MRM transition 538.2/159.0 and 585.9/159.0  
303 for the triphosphate **6** and Br-ATP, respectively. Matched-matrix (e.g. mouse PBMC lysate) with  
304 similar cell concentration as the samples were used for calibration and QC. The LLOQ was 0.065  
305 pmol/3 million cells.

306 The triphosphate concentration obtained from LC-MS/MS analysis was expressed as mol  
307 per number of cells. The triphosphate concentration per cell volume (in  $\mu$ M) was calculated using  
308 the corpuscular volume of 283 fL for PBMC (30).

### 309 *In vivo studies*

310 All Novartis animal studies were approved by institutional review board at different sites  
311 and different authorities where the experiments were carried.

312 The dog pharmacokinetic studies of compound **12**, **14**, **17**, and **18** were conducted using  
313 beagle dogs by intravenous administration (i.v., 0.5 mg/kg) or oral gavage (p.o., 3 mg/kg for each  
314 compound and 15 mg/kg only for (**17**)). A solution formulation containing 20% PEG300, 5%  
315 Solutol HS-15, and 5% dextran in water was used for both the i.v. and p.o. doses. Blood samples  
316 (3.5 ml, anticoagulant: K<sub>2</sub>EDTA) were collected at 0, 0.083 (i.v. only), 0.25, 0.5, 1, 2, 4, 6, 8, 24,  
317 48, and 72 hours post-dosing.

318 The subsequent pharmacokinetic and toxicology studies of **17** were conducted using solid  
319 dispersion and nanosuspension formulations in beagle dogs weighing 7 to 15 kg. The solid  
320 dispersion batch of compound **17** was dosed p.o. at 15 mg/kg of the active ingredient. The



321 nanosuspension formulation was dosed in 1% hydroxypropyl methylcellulose, 0.2% sodium  
322 dodecyl sulfate. Blood samples were collected at 0, 0.25, 0.5, 1, 2, 4, 7, 24, 48, 72, 96, and 168  
323 hours for the analysis of intact prodrug and metabolite **7** in plasma and triphosphate in PBMCs.

324 The toxicology studies were performed at Charles River Laboratories Preclinical Services  
325 Montreal (Sherbrooke, Canada) under the sponsor of Novartis. Male and female Wistar Han rats  
326 (Charles River, Raleigh, NC) and beagle dogs (Marshall BioResources, North Rose, NY) were  
327 used. The solid dispersion batch of **17** was prepared and administered daily by oral gavage (20  
328 mg/kg for rats or 12 mg/kg for dogs) for up to two weeks at doses of 30 (dog only), 100, 300, and  
329 1000 (rat only) mg/kg/day. Blood samples (anticoagulant: K<sub>2</sub>EDTA) were collected on day 1 and  
330 14 (0.5, 1, 3, 7, and 24 hours post-1<sup>st</sup>-dose for dogs) for the analysis of intact prodrug and  
331 metabolite **7** in plasma and triphosphate **6** in PBMCs.

332 Prior to this study, a rising dose toxicology study had been conducted at single doses of 10,  
333 30, 100 and 300 mg/kg. Assessment of the dose proportionalities of the plasma intact prodrug and  
334 metabolite **7** as well as the PBMC triphosphate were obtained for the toxicokinetic data of this  
335 rising dose study.

336 AG129 mice (lacking IFN- $\alpha/\beta$  and IFN- $\gamma$  receptors (31)) was obtained from Biological  
337 Resource Center (BRC), Singapore. Male and female AG129 mice aged 8 to 14 weeks (weighing  
338 20-30 grams) were used. Infection of DENV-2 (strain TSV01) was given intraperitoneally (500  
339  $\mu$ l,  $1.4 \times 10^7$  pfu/ml). The solid dispersion batch of **17** was dosed p.o. immediately after infection.  
340 The doses given were 10, 30, 100, and 300 mg/kg twice daily for 3 consecutive days. Blood  
341 samples (anticoagulant: K<sub>2</sub>EDTA) for pharmacokinetic analysis of the intact prodrug and  
342 nucleoside metabolite **7** in plasma were collected on day 1 and 3 post-infection (1, 3, 6, 24, 48, 50,  
343 52, 55, and 72 hours post-1<sup>st</sup>-dose). Pooled blood samples of 6 mice were collected at the terminal

344 time point for PBMC triphosphate analysis by LC-MS/MS. Plasma was also obtained from the  
345 terminal blood sample of each mouse for viremia read-out by plaque assay.

346 The non-compartmental pharmacokinetic parameters from various studies were calculated  
347 either using Watson LIMS (Thermo Fisher Scientific, Waltham, MA) or WinNonlin 5.01  
348 (Pharsight Corporation, Mountain View, CA).

## 349 RESULTS

### 350 Chemistry and Structure-Activity/Property-Relationship (SAR/SPR)

351 We employed 2'-deoxy-2'-fluoro-2'-*C*-methylguanosine as a starting point and  
352 investigated a suitable prodrug moiety to effectively deliver the monophosphate into PBMCs for  
353 the treatment of dengue. From various types of nucleotide prodrugs, we focused our attention on  
354 3',5'-cyclic phosphoramidates (32). To access the cyclic phosphoramidate prodrugs, the  
355 nucleoside starting material, 6-*O*-alkyl-2'-deoxy-2'-fluoro-2'-*C*-methylguanosine **8** was prepared  
356 according to the literature (33). This guanosine analog **8** was reacted with pentafluorophenyl ester  
357 agent **9** in the presence of *tert*-BuMgCl as a base to afford the linear phosphoramidate product **10**  
358 as a mixture of diastereomers. The cyclization step was carried out by treatment of **10** with *t*-BuOK  
359 in DMSO to afford a diastereomeric mixture of cyclic products **11**, which were separated by RP-  
360 HPLC to give each single phosphorous stereoisomer (Scheme 1). The phosphorous  
361 stereochemistry of one of the cyclic phosphoramidates **17** was assigned as *R<sub>p</sub>* configuration as  
362 determined by single crystal X-ray analysis (Fig. 2). The X-ray structure of **17** indicates that the  
363 phosphoramidate moiety is *cis* oriented to the guanine base through H-bond formation between  
364 the carbonyl and 7-NH<sub>2</sub>. In the <sup>31</sup>P NMR, the phosphorous peak of *R<sub>p</sub>* isomer **17** appeared at upper  
365 field than the corresponding *S<sub>p</sub>* isomer. This observation was applied to assign the phosphorous  
366 stereochemistry for the rest of the analogs.

367 Over 150 cyclic phosphoramidates were synthesized with variations in the ester, amino  
368 acid, phosphorous stereoisomer, and *C*-6 substitutions on the guanine base. As highlighted in Table  
369 1, the prodrugs were assessed by cellular anti-dengue activity, plasma stability, liver S9 stability,  
370 intestinal S9 stability to select the best prodrug with a balanced profile. Most of the prodrugs had  
371 over 120 min half-life in plasma and intestinal S9 fraction in higher species (dogs and human).

372 The cyclic prodrug **12** had the same amino acid moiety (*S*-Ala-O*i*Pr) and phosphorus  
373 stereochemistry (*Sp*) with **5** but showed 2-fold longer half-life than the linear prodrug **5** in human  
374 liver S9 fraction. The *Rp* isomer **13** was much less potent with 2-fold longer liver S9 half-life as  
375 compared to the *Sp* isomer **12**. The corresponding (*R*)-alanine analogs **14** and **15** led to reduced  
376 anti-dengue activity. The glycine analog **16** had similar potency and stability profile as the alanine  
377 prodrug **13**. The ethyl ester **17** showed 3-fold improvement in the potency with maintaining similar  
378 liver S9 stability. The methyl ester **18** had similar potency with good stability profile. The more  
379 lipophilic 6-*O-i*Pr analog **19** did not change anti-dengue activity and *in vitro* stability. The (*S*)-  
380 valine analog **20** was not as good as the (*S*)-alanine prodrug **12**. Based on the balance of antiviral  
381 activities and *in vitro* stability profiles, alanine-based prodrugs with different combination of esters  
382 and stereoisomers (**12**, **14**, **17**, **18**) were selected for further characterization.

383 **Cyclic phosphoramidate prodrugs of 2'-deoxy-2'-fluoro-2'-C-methylguanosine convert to**  
384 **their corresponding triphosphate form in PBMCs in multiple species.**

385 Selected cyclic phosphoramidate prodrugs **12**, **14**, **17**, **18** as well as the linear  
386 phosphoramidate PSI-353661 (**5**) were tested for its triphosphate concentration in PBMCs *in vitro*.  
387 A continuous incubation for 24 hours and prodrug concentration of 10  $\mu$ M was chosen to allow  
388 the detection of the triphosphate forms at the linear phase (before saturation) of the enzymatic  
389 processes (see also Fig. 6).

390 Different prodrugs converted to the same triphosphate at different rates and their potencies  
391 reflected the intracellular triphosphate concentrations reached. A trend of linear correlation was  
392 observed between triphosphate levels and potencies in human PBMCs (Fig. 3) and the most potent  
393 compound **12** showed the highest triphosphate level *in vitro*. Conversely, the intracellular  
394 triphosphate levels *in vivo* were determined not only by the triphosphate conversion in cells but

395 also by the intact prodrug exposure in plasma. In this regard, compound **17** showed the highest *in*  
396 *vivo* triphosphate level in dog PBMCs instead of **12**. Compound **17** was then assessed for its  
397 triphosphate conversion in multiple species *in vitro*. Table 2 demonstrated that the prodrug was  
398 converted to different levels of triphosphate in the PBMCs of all the species relevant for safety  
399 and efficacy assessment (mouse, rat, dog, monkey, and human).

400 **Cyclic phosphoramidate prodrug of 2'-deoxy-2'-fluoro-2'-C-methylguanosine shows similar**  
401 **triphosphate conversion kinetic as the linear phosphoramidate analog and sustained**  
402 **triphosphate level.**

403 The conversion of a phosphoramidate prodrug to its active triphosphate form is a multi-  
404 steps biotransformation process (34-37). To assess the kinetics of triphosphate formation and the  
405 impact of the cyclic phosphoramidate moiety, compound **17** (cyclic phosphoramidate) and **5** (linear  
406 phosphoramidate) were incubated in human PBMCs and the intracellular triphosphate  
407 concentration was measured at different time points. Both **17** and **5** showed similar kinetic in  
408 triphosphate formation (Fig. 4A). Furthermore, the intracellular triphosphate formed was sustained  
409 upon prodrug removal (Fig 4B, terminal half-life ~20 hours).

410 **Cyclic phosphoramidate prodrugs of 2'-deoxy-2'-fluoro-2'-C-methylguanosine show**  
411 **different pharmacokinetic profiles and triphosphate levels in dogs.**

412 Compounds **12**, **14**, **17**, **18** were dosed i.v. (0.5 mg/kg) and p.o. (3 mg/kg) in dogs to  
413 determine their pharmacokinetic parameters (Table 3). The triphosphate concentration in PBMCs  
414 was quantified and a trend of correlation between the  $C_{max}$  or AUC of the prodrug *versus* the  
415 triphosphate was observed (Fig. 5B-C and Table 3). Compound **17** showed the highest intracellular  
416 triphosphate level in PBMCs after oral dosing, thus it was selected for further characterization  
417 (Fig. 5A).

418 **Compound 17 shows pan-serotype and good antiviral activities in multiple cell lines**

419 The triphosphate **6** was confirmed to be a potent inhibitor of dengue RdRp with IC<sub>50</sub> of 1.1  
420 μM in the Dengue 4 RdRp assay.

421 The activities of **17** against all the four DENV serotypes were examined in primary human  
422 PBMCs and in cell lines other than PBMCs. Compound **17** was active against all DENV serotypes  
423 as shown in Table 4. It also showed good activity in multiple cell lines which may be important  
424 for *in vivo* efficacy as DENV infection shows a broad tissue tropism (38).

425 **TP<sub>50</sub> - determination of exposure target for efficacy.**

426 An exposure target (TP<sub>50</sub>) was established to assess the efficacy of **17** *in vivo*. TP<sub>50</sub>, the  
427 intracellular triphosphate concentration at which 50% of the virus replication is inhibited, was  
428 determined in human PBMCs. The TP<sub>50</sub> value of compound **17** obtained from 3 independent  
429 experiments (triplicate measurement in each experiment) is 0.78 ± 0.43 μM. Fig. 6 shows that the  
430 prodrug incubation followed Michaelis-Menten kinetic: saturation of the triphosphate conversion  
431 process was observed.

432 **Proof-of-concept in mouse model.**

433 Compound **17** (given p.o. at 10, 30, 100, and 300 mg/kg twice daily for 3 days) was  
434 assessed in the AG129 viremia mouse model (31). The mice infected with DENV-2 (strain TSV01)  
435 leads to viremia which peaks on day 3 post-infection.

436 The intact prodrug was not detectable in the plasma samples due to high esterase activities  
437 in rodents. Nucleoside metabolite **7**, the final biotransformation product in plasma, was detected.  
438 Table 5 shows the pharmacokinetic parameters obtained and a trend of dose-proportionality. The  
439 PBMC triphosphate terminal concentration was quantified from a pool of 6 mice. On day 3, the

440 intracellular triphosphate levels of the 30 and 100 mg/kg twice daily groups were 0.39 and 1.43  
441  $\mu\text{M}$ , respectively. The terminal triphosphate concentration reached  $\text{TP}_{50}$  (0.78  $\mu\text{M}$ ) for the 100  
442 mg/kg but not for the 30 mg/kg group and showed efficacy at 100 and 300 mg/kg twice daily as it  
443 reduced viremia significantly by 28- and 54-fold (or 1.6- and 2.2 log), respectively. The compound  
444 was not efficacious at 10 and 30 mg/kg twice daily (viremia reduction was 3- and 4-fold,  
445 respectively, and not significant) (Fig. 7).

#### 446 **Formulation work and dose escalation study.**

447 Solution, nanosuspension, and solid dispersion formulations were tested by dosing  
448 compound **17** orally at 15 mg/kg to beagle dogs (Table 6). Solid dispersion showed the highest  
449 oral bioavailability.

450 Using the optimized formulation, the dose-proportionality was assessed in dogs (10, 30,  
451 100, 300 mg/kg). A dose-proportionality was observed for the intact prodrug and metabolite **7** in  
452 plasma (Fig. 8A-B and Table 7). The intact prodrug had a short half-life (<1 hour), while the  
453 metabolite **7** has a long half-life (9-13 hour) and constituted the major metabolite in dogs. Other  
454 phosphoramidate intermediates were also detected in plasma but at lower levels and much shorter  
455 half-lives (data not shown).

456 Upon single oral dose of **17**, a prolonged exposure of triphosphate **6** in PBMCs was  
457 observed. The triphosphate half-life was 3.5 days in dogs. A trend of dose-proportionality was  
458 observed albeit the high variability of the triphosphate levels (Fig. 8C and Table 7).

#### 459 ***In vitro* and *in vivo* safety assessment.**

460 Compound **17** was assessed in multiple cell lines (HepG2, THP-1, MT-4 (27) and PC-3  
461 (39)) as well as in various *in vitro* biochemical assays including the mini-Ames test for

462 genotoxicity, hERG (human ether-a-go-go related gene) channel for cardiovascular toxicity,  
463 CYP450 inhibition for drug-drug interaction, micronucleus assay for mutagenicity, and various  
464 receptors, ion channels, and kinase profiles. The compound did not show significant inhibition in  
465 any of these assays. PSI-353661 (**5**) has been assessed in various cytotoxicity assays including in  
466 HepG2, huh-7, and BxPC3 and the compound shows  $CC_{50} \geq 80 \mu\text{M}$  (35). We demonstrated here  
467 that a modification of the prodrug moiety (from linear to cyclic phosphoramidate) does not change  
468 the *in vitro* toxicity profiles.

469         With the clean *in vitro* profile, compound **17** was administered to rats (30, 100, 300, and  
470 1,000 mg/kg/day) and dogs (30, 100, and 300 mg/kg/day) for up to 14 days for *in vivo* toxicology  
471 evaluation. The compound was tolerated in rats when given up to 1,000 mg/kg/day for 14  
472 consecutive days. Unfortunately, compound **17** was poorly tolerated in dogs. On day 7-9,  
473 significant findings in the lung (inflammation and hemorrhage) led to severe decline in the canine  
474 health, moribund and necessary termination of some animals from the top dose group. The findings  
475 were dose-related and mild pulmonary inflammation and hemorrhage were already observed in  
476 one of the six dogs in the 30 mg/kg/day group and no observed adverse effect level (NOAEL) was  
477 not achieved in the dogs. Table 8 shows the triphosphate levels in dog PBMCs obtained on day 1  
478 and day 14 (only from the 30 mg/kg/day group). A trend of dose-proportionality was observed  
479 between 30 and 100 mg/kg/day, but the proportionality diminished between 100 and 300  
480 mg/kg/day (Table 7). No accumulation was observed between day 1 and day 14 triphosphate levels  
481 at 30 mg/kg/day.



## 482 **DISCUSSION**

483 Our objective is to develop an oral dengue drug that is efficacious and safe. Nucleoside  
484 analogs offer several advantages as dengue drug candidates as they target an essential viral specific  
485 enzyme RdRp (5), have pan-serotypic activity and high resistance barrier (8). As PBMCs is one  
486 of the major viral replication sites (24), the active triphosphate concentration in PBMCs was used  
487 as a pharmacological marker for efficacy in addition to EC<sub>50</sub> value generated in PBMCs. The same  
488 measurement of triphosphate concentration in the target organs has also been used as a  
489 pharmacological marker for HIV (40).

490 Several successful examples of nucleoside antivirals have been developed for HIV, HSV,  
491 HBV, and HCV therapeutic areas (6). In dengue, two different nucleosides have been reported i.e.  
492 NITD-008 and balapiravir. NITD-008 demonstrated good oral efficacy in the dengue model, but  
493 it was unable to progress to human clinical trials due to insufficient safety profile (10). Balapiravir  
494 was repurposed from HCV in a phase II dengue clinical trial, but failed to reduce viral load in the  
495 patients (13). Although the reasons remain to be fully understood, one potential reason could be  
496 the state of PBMC dengue viral infection (12).

497 In an attempt to bypass the rate-limiting phosphorylation step, we explored the potential of  
498 monophosphate prodrug approach, starting from guanosine-based nucleoside analogs.  
499 Monophosphate prodrugs have been developed to deliver nucleoside monophosphates directly into  
500 the cells, resulting in higher intracellular level of the active triphosphates (16, 18). Examples of  
501 monophosphate prodrug strategies for 2'-deoxy-2'-fluoro-2'-C-methylguanosine were  
502 demonstrated by Pharmasset and exemplified by PSI-352938 (4) (21, 22) and PSI-353661 (5) (23)  
503 for HCV treatment. PSI-352938 passed preclinical safety assessment and was well-tolerated at  
504 doses of up to 1600 mg once daily in phase I study (18). In a later phase II study, compound 4

505 caused liver function abnormalities after 13 weeks dosing (41). Although PSI-352938 caused  
506 hepatotoxicity after chronic dosing, we reasoned that this could still be a good starting point for  
507 dengue since the toxicity is reversible and DENV treatment duration need only be a week or less  
508 (9). In addition, we suspected the triphosphate metabolite could be the reason for liver toxicity and  
509 hypothesized that modification of prodrug moiety could change the compound distribution and  
510 thus reduce liver toxicity. Our prodrugs are specifically designed to maximize the stability in GI,  
511 liver, and systemic circulation before penetrating into PBMCs. Once inside, the intracellular  
512 enzymes in PBMC would unmask the prodrug moieties easily, allowing further metabolism to the  
513 active triphosphate. We used *in vitro* stability in liver and intestinal S9 fractions, plasma stability  
514 together with cellular anti-dengue activity in PBMCs to find the most balanced compound. Indeed  
515 when tested *in vivo*, compound **17** generated the highest level of triphosphate in dog PBMCs.  
516 Indeed, the major organ for toxicity has shifted from liver to lung, possibly due to much higher  
517 systemic and lung exposure.

518 The common guanosine-based nucleoside triphosphate **6** of PSI-352938 and PSI-353661  
519 showed potent inhibition for dengue RdRp with IC<sub>50</sub> value of 1.1 μM. PSI-352938 (**4**) and PSI-  
520 353661 (**5**) also displayed inhibition of DENV in Huh-7 replicon cells with EC<sub>50</sub> values of 0.76  
521 μM and 0.044 μM respectively. The corresponding free nucleoside, 2'-deoxy-2'-fluoro-2'-C-  
522 methylguanosine **7** was inactive (EC<sub>50</sub> >50 μM), suggesting the addition of first phosphate addition  
523 is the rate limiting step in Huh7 cells. On the other hand, PSI-352938 (**4**) was not active in the  
524 dengue human PBMC plaque assay since the first step of activation of **4** was triggered by CYP3A4  
525 mediated P-O-dealkylation (37), which is absent in PBMCs. Finally, PSI-353661 (**5**) exhibited  
526 potency against dengue with EC<sub>50</sub> of 0.17 μM in PBMCs. Compound **5** was not ideal for dengue  
527 as it had a short half-life in liver S9 fraction (<20 min), and was designed for targeting the liver

528 and not for systemic distribution as required. We therefore pursued a suitable prodrug moiety to  
529 balance the stability profiles, particularly in liver S9 and EC<sub>50</sub> in PBMCs.

530 From various types of nucleotide prodrug, we became interested in 3',5'-cyclic  
531 phosphoramidates (32). This particular prodrug could offer additional advantages as compared to  
532 the linear phosphoramidates like PSI-353661 (**5**) as they masked the 3'-free OH and reduced a  
533 degree of rotational freedom, potentially allowing for improved cell entry and prolonged metabolic  
534 stability in the liver. In addition, 3',5'-cyclization eliminated the release of toxic aromatic alcohols  
535 like phenol and naphthol. Over 150 cyclic phosphoramidates were synthesized with variation in the  
536 ester, amino acid, phosphorous stereoisomer, and C-6 substitution on the guanine base. Based on  
537 the balance between antiviral activity and *in vitro* stability profiles, we selected alanine prodrugs  
538 with different combination of esters and stereoisomers (**12**, **14**, **17**, **18**) for further characterization.  
539 We directly monitored the concentration of the active triphosphate **6** in PBMCs and observed a  
540 trend of linear correlation between potencies and PBMC triphosphate levels. This correlation is  
541 expected as the triphosphate is the active form inhibiting viral replication through termination of  
542 RNA-chain synthesis (7, 10).

543 *In vivo* pharmacokinetic profiling for the selected prodrugs **12**, **14**, **17**, **18** were performed  
544 in dogs using i.v. at 0.5 mg/kg and p.o. at 3 mg/kg to establish plasma clearance, oral absorption  
545 and triphosphate loading in PBMCs over 24 hours. Prodrug **12** had the least stability (the highest  
546 clearance) both *in vitro* in liver S9 and *in vivo*. All the prodrugs had good solubility (>0.4 g/L from  
547 high-throughput equilibrium solubility) and low-to-moderate permeability (data not shown) and  
548 the *in vivo* pharmacokinetic profiles obtained were similar. Overall, a good *in vitro* – *in vivo*  
549 correlation (IVIVC) was observed for all the compounds. Compound **17** showed the highest level  
550 of triphosphate in PBMCs (about 3-fold), albeit with high inter-animal variabilities, confirming

551 our hypothesis that a balanced S9 and plasma stability combined with potent antiviral activity led  
552 to the highest level of triphosphate in PBMC. The fact that multiple host enzymes were needed to  
553 convert the prodrug to pharmaceutically active triphosphate may explain the higher variability  
554 among animals tested. It was also known that small modification of the phosphoramidate prodrugs  
555 could change the triphosphate conversion dramatically (42). Due to the highest loading of the  
556 triphosphate in PBMCs when dosed *in vivo*, **17** was selected for further characterization.

557 To assess the relevance of various animal models for pharmacokinetic, efficacy, and safety  
558 evaluation of a nucleoside prodrug, we first tested compound **17** for triphosphate conversion in  
559 PBMCs of multiple species. In fact, species difference in triphosphate conversion has been well  
560 documented (36, 37, 42, 43). We demonstrated that **17** was converted to the active triphosphate in  
561 the PBMCs of all the relevant species, including mice and monkeys which enable compound  
562 assessment in the two different dengue animal models if needed (31, 44).

563 We also evaluated the behavior of triphosphate **6** in PBMCs in terms of conversion kinetic  
564 and half-life. Our data demonstrated that both cyclic and linear phosphoramidate prodrugs showed  
565 similar triphosphate conversion kinetics *in vitro*. Furthermore, the triphosphate level of **17** is  
566 sustained upon prodrug removal, with the half-life (~20 hours) similar to other reported nucleoside  
567 triphosphates in lymphocyte or monocyte-derived cells (45, 46).

568 To define the minimum efficacious dose of prodrug **17**, we defined TP<sub>50</sub> as the intracellular  
569 triphosphate concentration at which 50% of the viral replication is inhibited. TP<sub>50</sub> is defined as the  
570 intracellular concentration of triphosphate yielded upon incubation of prodrug at its EC<sub>50</sub> in human  
571 PBMCs. We found that the TP<sub>50</sub> value of **17** (0.78 μM) was close to its IC<sub>50</sub> (1.1 μM) obtained  
572 from the polymerase enzyme assay. Next, we wanted to assess if the level of triphosphate can be  
573 translated to efficacy *in vivo* using a dengue viremia mouse model (31). Due to the abundant

574 carboxylesterases in the plasma of rodent species (36, 47), 100 and 300 mg/kg twice daily oral  
575 dosing for 3 days was needed to achieve at least 1 log viremia reduction (28- and 54-fold viremia  
576 reduction, respectively), while the efficacy was not observed at 10 and 30 mg/kg (only 3- and 4-  
577 fold viremia reduction, respectively). Pooled terminal blood samples were taken on day 3 post-  
578 infection from the 30 and 100 mg/kg groups and measured for the triphosphate concentration in  
579 PBMCs. The intracellular triphosphate concentration on day 3 reached TP<sub>50</sub> (0.78 μM) for the 100  
580 mg/kg group (1.43 μM), but not for the 30 mg/kg group (0.39 μM). Based on these *in vitro* and *in*  
581 *vivo* results, we defined here for the first time the minimum efficacious dose for a nucleos(t)ide  
582 prodrug as the dose that is required to maintain triphosphate concentration in PBMCs above TP<sub>50</sub>.  
583 By applying this principle to dog species, whose plasma stability is close to human, compound **17**  
584 reached TP<sub>50</sub> already at 10 mg/kg (Fig. 8C).

585 Having been able to estimate minimum efficacious dose in dogs, the compound was  
586 prepared for preclinical toxicological evaluation *in vivo*. Upon physical form screening, **17** showed  
587 more than one crystal structures (polymorphism). A single crystal form was selected for its  
588 superior physico-chemical properties. Assessment of this form in dogs showed poor oral  
589 bioavailability (1%) from conventional suspension formulation (0.5% Tween80 and 0.5% methyl  
590 cellulose in water - data not shown). To enable high dose toxicology studies, a formulation work  
591 was conducted.

592 A high concentration solution formulation of compound **17** ( $\geq 10$  mg/ml) with low total  
593 organic content (<30%) could not be achieved. The selected crystal form of **17** had low to medium  
594 aqueous solubility (<0.1 mg/ml in pH 3 to 6.8 and in bio-relevant media), low intrinsic dissolution  
595 rate and a low logP. A nanosuspension formulation was developed but resulted in low oral  
596 bioavailability (8.5%). Eventually, a solid dispersion formulation was feasible for high dose *in*

597 *vivo* studies. Upon evaluation in dogs, the solid dispersion formulation improved the oral  
598 bioavailability (68%) from suspension (1%) as well as from the solution formulation (oral  
599 bioavailability 24% at similar dose) used in our early prodrug selection. Using this optimized  
600 formulation, compound **17** was assessed for dose-proportionality in dogs. The compound showed  
601 a trend of dose-proportionality for the intact prodrug and free nucleoside metabolite in plasma as  
602 well as for the triphosphate in PBMCs. The levels of triphosphate was sustained at a level above  
603 TP<sub>50</sub> for at least one-week after a single dose of 10 mg/kg (half-life 3.5 days), making the  
604 compound potential for a single-dose cure.

605         Compound **17** was further assessed for safety in rat and dog toxicology studies. Although  
606 the stability of **17** in rat plasma is <5 min, the triphosphate could still be detected in PBMCs upon  
607 multiple oral dosing. An oral administration of **17** was tolerated up to 1,000 mg/kg/day when given  
608 for 14 consecutive days to wistar rats. A quantitative whole-body autoradiography (QWBA) study  
609 shows an extensive distribution to most rat tissues, except the central nervous system and testis,  
610 after a single-dose of 100 mg/kg [<sup>14</sup>C]compound **17** (data not shown). This observation is in  
611 agreement with our hypothesis that the change in prodrug moiety could lead to systemic  
612 distribution.

613         Next, compound **17** was administered orally to beagle dogs for up to two weeks at 30, 100,  
614 and 300 mg/kg/day. The compound was not tolerated at 100 and 300 mg/kg/day and clinical signs  
615 accompanied by weight loss were first observed in dogs in day 7; which was accompanied by early  
616 termination for these two groups. Liver was not the target organ for this compound, unlike the  
617 liver-targeting PSI-352938, as our prodrug moiety has changed the compound distribution.  
618 However, tubular degeneration of the kidneys, lung inflammation and hemorrhage were observed,  
619 among other findings.

620 Dose proportionality of the intact prodrug and nucleoside metabolite in plasma as well as  
621 the triphosphate in PBMCs was observed from 30 to 100 mg/kg/day, but was under proportional  
622 from 100 to 300 mg/kg/day (Table 7). The triphosphate reached very high exposure in PBMCs  
623 and there was no triphosphate accumulation observed upon multiple dosing of 30 mg/kg/day for  
624 14 consecutive days. The triphosphate levels achieved in dogs were generally higher than the ones  
625 in rats at similar doses i.e. terminal concentration in PBMCs (day 15) was 10  $\mu$ M in rats (data not  
626 shown) and 50  $\mu$ M in dogs, which may be the reason for the clean finding in rats.

627 The pathology findings in dogs were dose-related and mild pulmonary inflammation and  
628 hemorrhage was already observed in one of the six dogs given 30 mg/kg/day of compound **17** for  
629 14 consecutive days. Therefore, a no observed adverse effect level (NOAEL) was not achieved in  
630 this study. Due to the severity of the adverse findings and only partial reversibility of such findings  
631 at high doses, further development of **17** was not pursued.

632 Taken together, we have shown the potential of monophosphate prodrugs for dengue and  
633 demonstrated a suitable prodrug moiety to effectively deliver the monophosphate into PBMCs  
634 upon oral dosing. We have addressed the efficacy of monophosphate prodrugs by demonstrating  
635 a proof-of-concept in a mouse model. We establish TP<sub>50</sub>, the intracellular triphosphate  
636 concentration at which 50% of the virus replication is inhibited, as an exposure target and define  
637 the minimum efficacious dose as the one that is required to maintain triphosphate concentration in  
638 PBMCs above TP<sub>50</sub>. This concept could be universally applied and will be useful to evaluate the  
639 efficacy of any dengue nucleos(t)ide monophosphate prodrug.

640 **ACKNOWLEDGEMENT**

641 The authors wish to thank Kwan Leung, David Beer, Paul Smith, Lv Liao, Margaret Weaver  
642 and Thierry Diagana for their helpful discussions to this project. Peter Wipfli, Ying-Bo Chen,  
643 Meng Hui Lim, and Mahesh Nanjundappa are kindly acknowledged for their analytical and  
644 pharmacokinetic work. We also appreciate Kah Fei Wan and his team for generating high-  
645 throughput antiviral activities. We are grateful to Caroline Rynn and her team for generating  
646 stability data in plasma, liver and intestinal S9. Ina Dix and Trixie Wagner are kindly  
647 acknowledged for their X-ray analysis of compound **17**. All authors were employees of Novartis  
648 at the time the work in this manuscript was performed.



## 649 REFERENCES

- 650 1. **Whitehorn J, Simmons CP.** 2011. The pathogenesis of dengue. *Vaccine* **29**:7221-7228.
- 651 2. **Bhatt S, Gething PW, Brady OJ, Messina JP, Farlow AW, Moyes CL, Drake JM, Brownstein JS,**  
652 **Hoehn AG, Sankoh O, Myers MF, George DB, Jaenisch T, Wint GR, Simmons CP, Scott TW, Farrar**  
653 **JJ, Hay SI.** 2013. The global distribution and burden of dengue. *Nature* **496**:504-507.
- 654 3. **Guzman MG, Alvarez M, Halstead SB.** 2013. Secondary infection as a risk factor for dengue  
655 hemorrhagic fever/dengue shock syndrome: an historical perspective and role of antibody-  
656 dependent enhancement of infection. *Arch Virol* **158**:1445-1459.
- 657 4. **Capeding MR, Tran NH, Hadinegoro SR, Ismail HI, Chotpitayasunondh T, Chua MN, Luong CQ,**  
658 **Rusmil K, Wirawan DN, Nallusamy R, Pitisuttithum P, Thisyakorn U, Yoon IK, van der Vliet D,**  
659 **Langevin E, Laot T, Hutagalung Y, Frago C, Boaz M, Wartel TA, Tornieporth NG, Saville M,**  
660 **Bouckennooghe A.** 2014. Clinical efficacy and safety of a novel tetravalent dengue vaccine in  
661 healthy children in Asia: a phase 3, randomised, observer-masked, placebo-controlled trial. *Lancet*  
662 **384**:1358-1365.
- 663 5. **Lim SP, Noble CG, Shi PY.** 2015. The dengue virus NS5 protein as a target for drug discovery.  
664 *Antiviral Res* **119**:57-67.
- 665 6. **Jordheim LP, Durantel D, Zoulim F, Dumontet C.** 2013. Advances in the development of  
666 nucleoside and nucleotide analogues for cancer and viral diseases. *Nat Rev Drug Discov* **12**:447-  
667 464.
- 668 7. **Chen YL, Yin Z, Duraiswamy J, Schul W, Lim CC, Liu B, Xu HY, Qing M, Yip A, Wang G, Chan WL,**  
669 **Tan HP, Lo M, Liung S, Kondreddi RR, Rao R, Gu H, He H, Keller TH, Shi PY.** 2010. Inhibition of  
670 dengue virus RNA synthesis by an adenosine nucleoside. *Antimicrob Agents Chemother* **54**:2932-  
671 2939.
- 672 8. **Delang L, Vliegen I, Froeyen M, Neyts J.** 2011. Comparative study of the genetic barriers and  
673 pathways towards resistance of selective inhibitors of hepatitis C virus replication. *Antimicrob*  
674 *Agents Chemother* **55**:4103-4113.
- 675 9. **Lim SP, Wang QY, Noble CG, Chen YL, Dong H, Zou B, Yokokawa F, Nilar S, Smith P, Beer D, Lescar**  
676 **J, Shi PY.** 2013. Ten years of dengue drug discovery: progress and prospects. *Antiviral Res* **100**:500-  
677 519.
- 678 10. **Yin Z, Chen YL, Schul W, Wang QY, Gu F, Duraiswamy J, Kondreddi RR, Niyomrattanakit P,**  
679 **Lakshminarayana SB, Goh A, Xu HY, Liu W, Liu B, Lim JY, Ng CY, Qing M, Lim CC, Yip A, Wang G,**  
680 **Chan WL, Tan HP, Lin K, Zhang B, Zou G, Bernard KA, Garrett C, Beltz K, Dong M, Weaver M, He**  
681 **H, Pichota A, Dartois V, Keller TH, Shi PY.** 2009. An adenosine nucleoside inhibitor of dengue  
682 virus. *Proc Natl Acad Sci U S A* **106**:20435-20439.
- 683 11. **Klumpp K, Smith DB.** 2011. *Antiviral Drugs: From Basic Discovery Through Clinical Trials*, 1st ed.  
684 John Wiley & Sons, Hoboken.
- 685 12. **Chen YL, Abdul Ghafar N, Karuna R, Fu Y, Lim SP, Schul W, Gu F, Herve M, Yokohama F, Wang G,**  
686 **Cerny D, Fink K, Blasco F, Shi PY.** 2014. Activation of peripheral blood mononuclear cells by  
687 dengue virus infection depotentiates balapiravir. *J Virol* **88**:1740-1747.
- 688 13. **Nguyen NM, Tran CN, Phung LK, Duong KT, Huynh Hle A, Farrar J, Nguyen QT, Tran HT, Nguyen**  
689 **CV, Merson L, Hoang LT, Hibberd ML, Aw PP, Wilm A, Nagarajan N, Nguyen DT, Pham MP,**  
690 **Nguyen TT, Javanbakht H, Klumpp K, Hammond J, Petric R, Wolbers M, Nguyen CT, Simmons**  
691 **CP.** 2013. A randomized, double-blind placebo controlled trial of balapiravir, a polymerase  
692 inhibitor, in adult dengue patients. *J Infect Dis* **207**:1442-1450.
- 693 14. **Stein DS, Moore KH.** 2001. Phosphorylation of nucleoside analog antiretrovirals: a review for  
694 clinicians. *Pharmacotherapy* **21**:11-34.

- 695 15. **McGuigan C, Harris SA, Daluge SM, Gudmundsson KS, McLean EW, Burnette TC, Marr H, Hazen**  
696 **R, Condreay LD, Johnson L, De Clercq E, Balzarini J.** 2005. Application of phosphoramidate  
697 pronucleotide technology to abacavir leads to a significant enhancement of antiviral potency. *J*  
698 *Med Chem* **48**:3504-3515.
- 699 16. **Pradere U, Garnier-Amblard EC, Coats SJ, Amblard F, Schinazi RF.** 2014. Synthesis of nucleoside  
700 phosphate and phosphonate prodrugs. *Chem Rev* **114**:9154-9218.
- 701 17. **Sofia MJ, Bao D, Chang W, Du J, Nagarathnam D, Rachakonda S, Reddy PG, Ross BS, Wang P,**  
702 **Zhang HR, Bansal S, Espiritu C, Keilman M, Lam AM, Steuer HM, Niu C, Otto MJ, Furman PA.**  
703 2010. Discovery of a beta-d-2'-deoxy-2'-alpha-fluoro-2'-beta-C-methyluridine nucleotide prodrug  
704 (PSI-7977) for the treatment of hepatitis C virus. *J Med Chem* **53**:7202-7218.
- 705 18. **Sofia MJ.** 2013. Nucleotide prodrugs for the treatment of HCV infection. *Adv Pharmacol* **67**:39-  
706 73.
- 707 19. **Siegel D, Hui HC, Doerffler E, Clarke MO, Chun K, Zhang L, Neville S, Carra E, Lew W, Ross B,**  
708 **Wang Q, Wolfe L, Jordan R, Soloveva V, Knox J, Perry J, Perron M, Stray KM, Barauskas O, Feng**  
709 **JY, Xu Y, Lee G, Rheingold AL, Ray AS, Bannister R, Strickley R, Swaminathan S, Lee WA, Bavari**  
710 **S, Cihlar T, Lo MK, Warren TK, Mackman RL.** 2017. Discovery and Synthesis of a Phosphoramidate  
711 Prodrug of a Pyrrolo[2,1-f][triazin-4-amino] Adenine C-Nucleoside (GS-5734) for the Treatment of  
712 Ebola and Emerging Viruses. *J Med Chem* doi:10.1021/acs.jmedchem.6b01594.
- 713 20. **Ray AS, Fordyce MW, Hitchcock MJ.** 2016. Tenofovir alafenamide: A novel prodrug of tenofovir  
714 for the treatment of Human Immunodeficiency Virus. *Antiviral Res* **125**:63-70.
- 715 21. **Lam AM, Espiritu C, Murakami E, Zennou V, Bansal S, Micolochick Steuer HM, Niu C, Keilman M,**  
716 **Bao H, Bourne N, Veselenak RL, Reddy PG, Chang W, Du J, Nagarathnam D, Sofia MJ, Otto MJ,**  
717 **Furman PA.** 2011. Inhibition of hepatitis C virus replicon RNA synthesis by PSI-352938, a cyclic  
718 phosphate prodrug of beta-D-2'-deoxy-2'-alpha-fluoro-2'-beta-C-methylguanosine. *Antimicrob*  
719 *Agents Chemother* **55**:2566-2575.
- 720 22. **Reddy PG, Bao D, Chang W, Chun BK, Du J, Nagarathnam D, Rachakonda S, Ross BS, Zhang HR,**  
721 **Bansal S, Espiritu CL, Keilman M, Lam AM, Niu C, Steuer HM, Furman PA, Otto MJ, Sofia MJ.**  
722 2010. 2'-deoxy-2'-alpha-fluoro-2'-beta-C-methyl 3',5'-cyclic phosphate nucleotide prodrug  
723 analogs as inhibitors of HCV NS5B polymerase: discovery of PSI-352938. *Bioorg Med Chem Lett*  
724 **20**:7376-7380.
- 725 23. **Chang W, Bao D, Chun BK, Naduthambi D, Nagarathnam D, Rachakonda S, Reddy PG, Ross BS,**  
726 **Zhang HR, Bansal S, Espiritu CL, Keilman M, Lam AM, Niu C, Steuer HM, Furman PA, Otto MJ,**  
727 **Sofia MJ.** 2011. Discovery of PSI-353661, a Novel Purine Nucleotide Prodrug for the Treatment of  
728 HCV Infection. *ACS Med Chem Lett* **2**:130-135.
- 729 24. **Fink K, Ng C, Nkenfou C, Vasudevan SG, van Rooijen N, Schul W.** 2009. Depletion of macrophages  
730 in mice results in higher dengue virus titers and highlights the role of macrophages for virus  
731 control. *Eur J Immunol* **39**:2809-2821.
- 732 25. **Yeo KL, Chen YL, Xu HY, Dong H, Wang QY, Yokokawa F, Shi PY.** 2015. Synergistic suppression of  
733 dengue virus replication using a combination of nucleoside analogs and nucleoside synthesis  
734 inhibitors. *Antimicrob Agents Chemother* **59**:2086-2093.
- 735 26. **Fu Y, Chen YL, Herve M, Gu F, Shi PY, Blasco F.** 2014. Development of a FACS-based assay for  
736 evaluating antiviral potency of compound in dengue infected peripheral blood mononuclear cells.  
737 *J Virol Methods* **196**:18-24.
- 738 27. **Fenaux M, Lin X, Yokokawa F, Sweeney Z, Saunders O, Xie L, Lim SP, Uteng M, Uehara K, Warne**  
739 **R, Gang W, Jones C, Yendluri S, Gu H, Mansfield K, Boisclair J, Heimbach T, Catoire A, Bracken K,**  
740 **Weaver M, Moser H, Zhong W.** 2016. Antiviral Nucleotide Incorporation by Recombinant Human  
741 Mitochondrial RNA Polymerase Is Predictive of Increased In Vivo Mitochondrial Toxicity Risk.  
742 *Antimicrob Agents Chemother* **60**:7077-7085.

- 743 28. **Hung M, Gibbs CS, Tsiang M.** 2002. Biochemical characterization of rhinovirus RNA-dependent  
744 RNA polymerase. *Antiviral Res* **56**:99-114.
- 745 29. **Niyomrattanakit P, Abas SN, Lim CC, Beer D, Shi PY, Chen YL.** 2011. A fluorescence-based alkaline  
746 phosphatase-coupled polymerase assay for identification of inhibitors of dengue virus RNA-  
747 dependent RNA polymerase. *J Biomol Screen* **16**:201-210.
- 748 30. **Simiele M, D'Avolio A, Baietto L, Siccardi M, Sciandra M, Agati S, Cusato J, Bonora S, Di Perri G.**  
749 2011. Evaluation of the mean corpuscular volume of peripheral blood mononuclear cells of HIV  
750 patients by a coulter counter to determine intracellular drug concentrations. *Antimicrob Agents*  
751 *Chemother* **55**:2976-2978.
- 752 31. **Schul W, Liu W, Xu HY, Flamand M, Vasudevan SG.** 2007. A dengue fever viremia model in mice  
753 shows reduction in viral replication and suppression of the inflammatory response after  
754 treatment with antiviral drugs. *J Infect Dis* **195**:665-674.
- 755 32. **Meppen M, Pacini B, Bazzo R, Koch U, Leone JF, Koeplinger KA, Rowley M, Altamura S, Di Marco**  
756 **A, Fiore F, Giuliano C, Gonzalez-Paz O, Laufer R, Pucci V, Narjes F, Gardelli C.** 2009. Cyclic  
757 phosphoramidates as prodrugs of 2'-C-methylcytidine. *Eur J Med Chem* **44**:3765-3770.
- 758 33. **Reddy PG, Chun BK, Zhang HR, Rachakonda S, Ross BS, Sofia MJ.** 2011. Stereoselective synthesis  
759 of PSI-352938: a beta-D-2'-deoxy-2'-alpha-fluoro-2'-beta-C-methyl-3',5'-cyclic phosphate  
760 nucleotide prodrug for the treatment of HCV. *J Org Chem* **76**:3782-3790.
- 761 34. **Birkus G, Kutty N, Frey CR, Shribata R, Chou T, Wagner C, McDermott M, Cihlar T.** 2011. Role of  
762 cathepsin A and lysosomes in the intracellular activation of novel antipapillomavirus agent GS-  
763 9191. *Antimicrob Agents Chemother* **55**:2166-2173.
- 764 35. **Furman PA, Murakami E, Niu C, Lam AM, Espiritu C, Bansal S, Bao H, Tolstykh T, Micolochick**  
765 **Steuer H, Keilman M, Zennou V, Bourne N, Veselenak RL, Chang W, Ross BS, Du J, Otto MJ, Sofia**  
766 **MJ.** 2011. Activity and the metabolic activation pathway of the potent and selective hepatitis C  
767 virus pronucleotide inhibitor PSI-353661. *Antiviral Res* **91**:120-132.
- 768 36. **Murakami E, Wang T, Babusis D, Lepist EI, Sauer D, Park Y, Vela JE, Shih R, Birkus G, Stefanidis**  
769 **D, Kim CU, Cho A, Ray AS.** 2014. Metabolism and pharmacokinetics of the anti-hepatitis C virus  
770 nucleotide prodrug GS-6620. *Antimicrob Agents Chemother* **58**:1943-1951.
- 771 37. **Niu C, Tolstykh T, Bao H, Park Y, Babusis D, Lam AM, Bansal S, Du J, Chang W, Reddy PG, Zhang**  
772 **HR, Woolley J, Wang LQ, Chao PB, Ray AS, Otto MJ, Sofia MJ, Furman PA, Murakami E.** 2012.  
773 Metabolic activation of the anti-hepatitis C virus nucleotide prodrug PSI-352938. *Antimicrob*  
774 *Agents Chemother* **56**:3767-3775.
- 775 38. **Martina BE, Koraka P, Osterhaus AD.** 2009. Dengue virus pathogenesis: an integrated view. *Clin*  
776 *Microbiol Rev* **22**:564-581.
- 777 39. **Feng JY, Xu Y, Barauskas O, Perry JK, Ahmadyar S, Stepan G, Yu H, Babusis D, Park Y, McCutcheon**  
778 **K, Perron M, Schultz BE, Sakowicz R, Ray AS.** 2016. Role of Mitochondrial RNA Polymerase in the  
779 Toxicity of Nucleotide Inhibitors of Hepatitis C Virus. *Antimicrob Agents Chemother* **60**:806-817.
- 780 40. **Bazzoli C, Jullien V, Le Tiec C, Rey E, Mentre F, Taburet AM.** 2010. Intracellular Pharmacokinetics  
781 of Antiretroviral Drugs in HIV-Infected Patients, and their Correlation with Drug Action. *Clin*  
782 *Pharmacokinet* **49**:17-45.
- 783 41. **Gentile I, Buonomo AR, Zappulo E, Borgia G.** 2015. Discontinued drugs in 2012 - 2013: hepatitis  
784 C virus infection. *Expert Opin Investig Drugs* **24**:239-251.
- 785 42. **Murakami E, Tolstykh T, Bao H, Niu C, Steuer HM, Bao D, Chang W, Espiritu C, Bansal S, Lam AM,**  
786 **Otto MJ, Sofia MJ, Furman PA.** 2010. Mechanism of activation of PSI-7851 and its diastereoisomer  
787 PSI-7977. *J Biol Chem* **285**:34337-34347.
- 788 43. **Birkus G, Wang R, Liu X, Kutty N, MacArthur H, Cihlar T, Gibbs C, Swaminathan S, Lee W,**  
789 **McDermott M.** 2007. Cathepsin A is the major hydrolase catalyzing the intracellular hydrolysis of

- 790 the antiretroviral nucleotide phosphonoamidate prodrugs GS-7340 and GS-9131. *Antimicrob*  
791 *Agents Chemother* **51**:543-550.
- 792 44. **Onlamoon N, Noisakran S, Hsiao HM, Duncan A, Villinger F, Ansari AA, Perng GC.** 2010. Dengue  
793 virus-induced hemorrhage in a nonhuman primate model. *Blood* **115**:1823-1834.
- 794 45. **Ray AS, Vela JE, Boojamra CG, Zhang L, Hui H, Callebaut C, Stray K, Lin KY, Gao Y, Mackman RL,**  
795 **Cihlar T.** 2008. Intracellular metabolism of the nucleotide prodrug GS-9131, a potent anti-human  
796 immunodeficiency virus agent. *Antimicrob Agents Chemother* **52**:648-654.
- 797 46. **Warren TK, Jordan R, Lo MK, Ray AS, Mackman RL, Soloveva V, Siegel D, Perron M, Bannister R,**  
798 **Hui HC, Larson N, Strickley R, Wells J, Stuthman KS, Van Tongeren SA, Garza NL, Donnelly G,**  
799 **Shurtleff AC, Retterer CJ, Gharaibeh D, Zamani R, Kenny T, Eaton BP, Grimes E, Welch LS, Gomba**  
800 **L, Wilhelmsen CL, Nichols DK, Nuss JE, Nagle ER, Kugelman JR, Palacios G, Doerffler E, Neville S,**  
801 **Carra E, Clarke MO, Zhang L, Lew W, Ross B, Wang Q, Chun K, Wolfe L, Babusis D, Park Y, Stray**  
802 **KM, Trancheva I, Feng JY, Barauskas O, Xu Y, Wong P, et al.** 2016. Therapeutic efficacy of the  
803 small molecule GS-5734 against Ebola virus in rhesus monkeys. *Nature* **531**:381-385.
- 804 47. **Bahar FG, Ohura K, Ogihara T, Imai T.** 2012. Species difference of esterase expression and  
805 hydrolase activity in plasma. *J Pharm Sci* **101**:3979-3988.

806

807 **FIGURE LEGENDS**

808 **Scheme 1.** Synthesis of cyclic phosphoramidate prodrugs of 6-*O*-alkyl-2'-deoxy-2'-fluoro-2'-*C*-  
809 methylguanosine. Reactions conditions: (i) *t*-BuMgCl, THF; (ii) *t*-BuOK, DMSO; (iii) Separation  
810 by preparative reverse phase HPLC.

811 **FIG 1. (A)** Structures and *in vitro* biological profile of NITD-008 **1**, R-1479 **2**, and balapiravir (**3**).  
812 **(B)** Structures and *in vitro* biological profile of PSI-352938 **4**, PSI-353661 **5**, and their  
813 corresponding triphosphate **6** and nucleoside **7** metabolites

814 **FIG 2.** Single X-ray crystal structure of compound **17**.

815 **FIG 3.** Correlation between triphosphate levels in human PBMCs *versus* potencies. Prodrugs were  
816 incubated in human PBMCs at 10  $\mu$ M concentration. Data obtained were from at least two  
817 independent experiments.

818 **FIG 4** Triphosphate measurement of selected compounds in PMBCs **(A)** Triphosphate conversion  
819 kinetics of prodrug **17** and linear phosphoramidate analog **5**. The triphosphate was expressed as  
820 the percentage of the formation as compared to the highest triphosphate level achieved for each  
821 prodrug (n=3). **(B)** Triphosphate measurement of **6** with a sustained level (terminal  $t_{1/2}$  ~20 hours)  
822 upon prodrug removal (n=3).

823 **FIG 5.** Selected prodrugs dosed orally (3 mg/kg) to beagle dogs (n=3). **(A)** Pharmacokinetic  
824 profiles of triphosphate metabolites in PBMCs. **(B)** Correlation between the  $C_{max}$  of prodrug in  
825 plasma and of triphosphate in PBMCs. **(C)** Correlation between the AUC of prodrug in plasma  
826 and of triphosphate in PBMCs.

827 **FIG 6.** Incubation of compound **17** with increasing concentration in human PBMCs to determine  
828 TP<sub>50</sub>.

829 **FIG 7.** Efficacy study in viremia mouse model. Each group contains 6 mice. Compound **17**  
830 reduced viremia by 3-, 4-, 28- and 54-folds at 10, 30, 100 and 300 mg/kg twice daily, respectively.  
831 The viremia reduction at 100 and 300 mg/kg twice daily are significant ( $p < 0.0001$ ). The difference  
832 in the viremia reduction between 30 and 100 or 300 mg/kg twice daily are also significant ( $p < 0.01$   
833 or  $p < 0.0001$ , respectively).

834 **FIG 8.** Pharmacokinetic profiles of the intact prodrug (**A**) major metabolite nucleoside **6** in plasma  
835 (**B**) and triphosphate metabolite **7** in PBMCs (**C**) upon raising doses of compound **17** in beagle  
836 dogs ( $n=3$ ). The triphosphate concentration in PBMCs was determined only from the 10 and 30  
837 mg/kg groups. At 10 mg/kg, the triphosphate level in PBMCs has exceeded  $TP_{50}$ .

**Scheme 1.** Synthesis of cyclic phosphoramidate prodrugs of 6-O-alkyl-2'-deoxy-2'-fluoro-2'-C-methylguanosine. Reactions conditions: (i) *t*-BuMgCl, THF; (ii) *t*-BuOK, DMSO; (iii) Separation by preparative reverse phase HPLC.

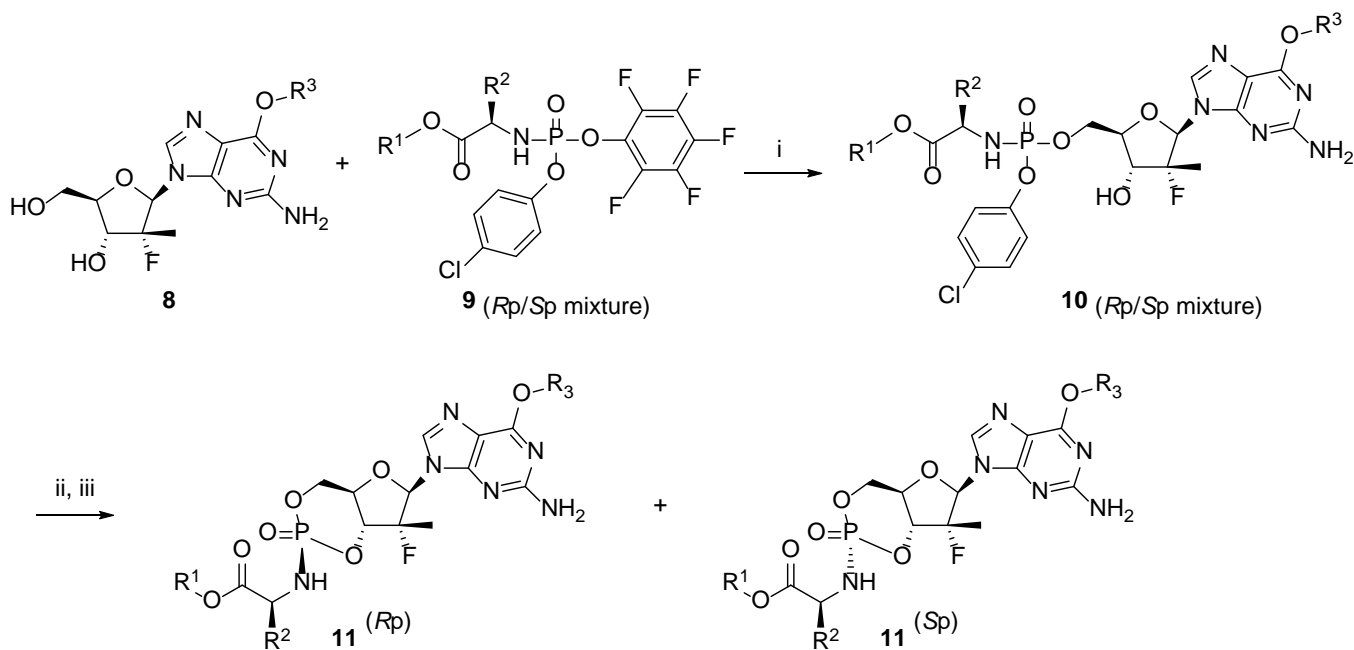

**FIG 1. (A)** Structures and *in vitro* biological profile of NITD-008 **1**, R-1479 **2**, and balapiravir **3**. **(B)** Structures and *in vitro* biological profile of PSI-352938 **4**, PSI-353661 **5**, and their corresponding triphosphate **6** and nucleoside **7** metabolites

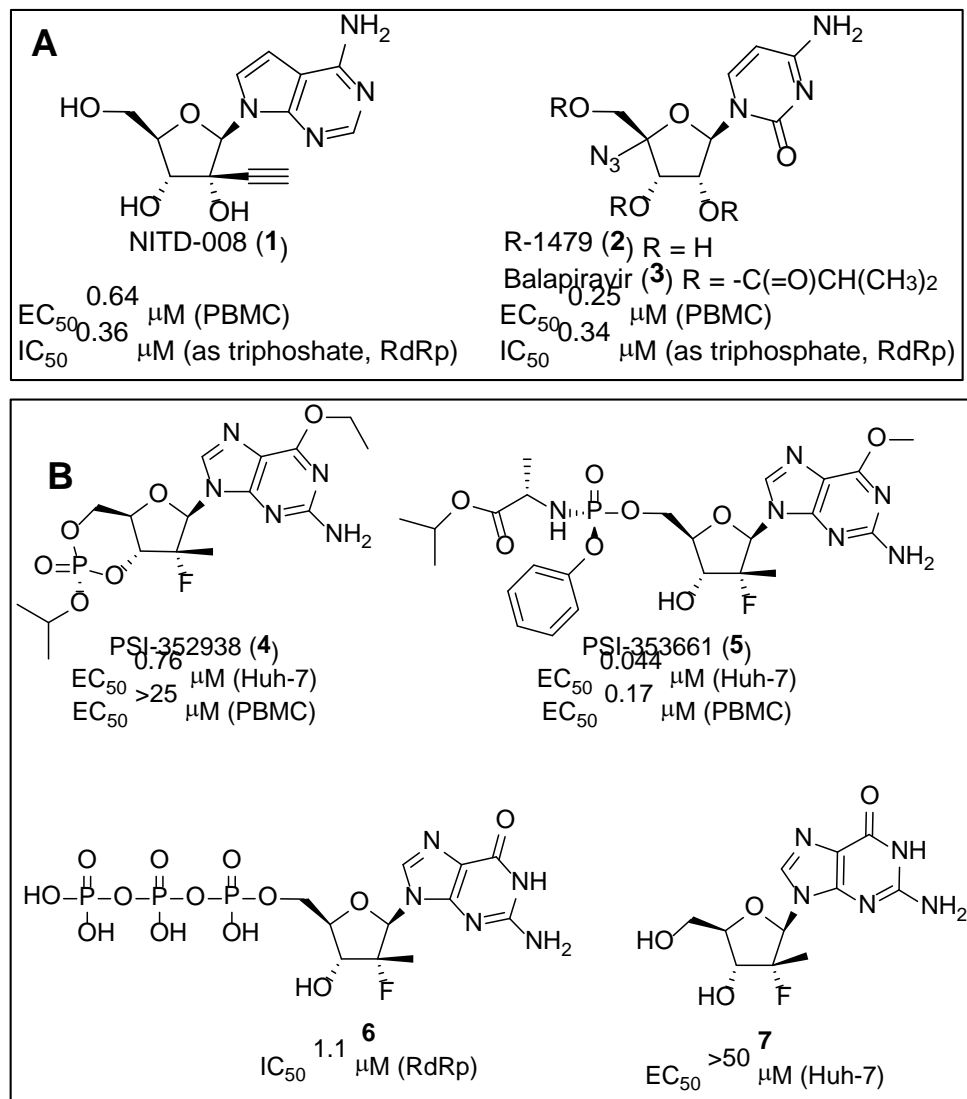



**FIG 2.** Single X-ray crystal structure of compound **17**.

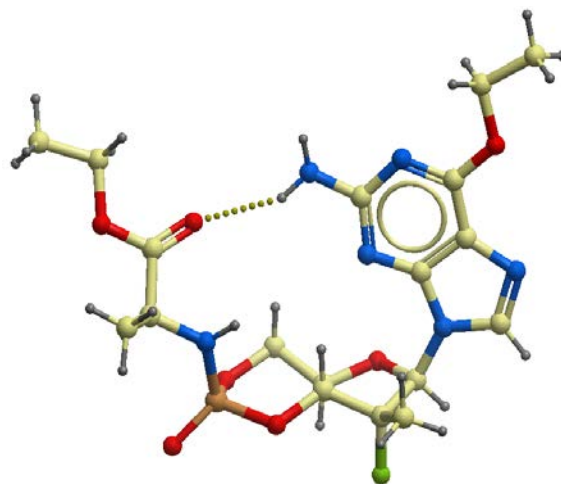

**FIG 3.** Correlation between triphosphate levels in human PBMCs *versus* potencies. Prodrugs were incubated in human PBMCs at 10  $\mu\text{M}$  concentration. Data obtained were from at least two independent experiments.

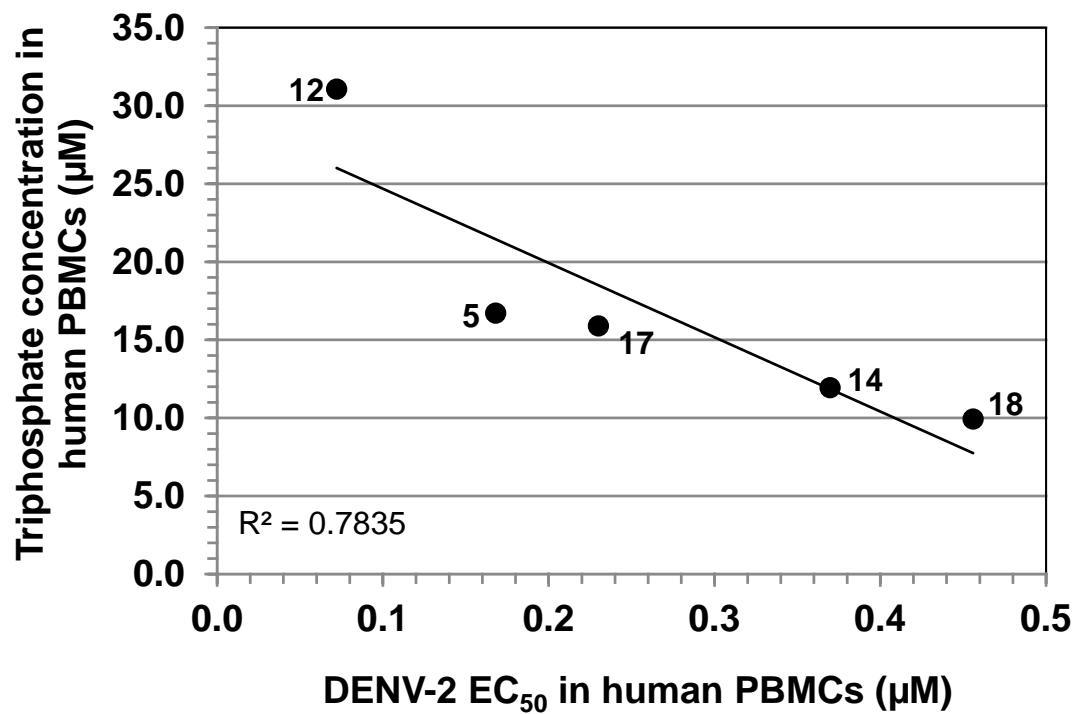

**FIG 4.** Triphosphate measurement of selected compounds in PMBCs **(A)** Triphosphate conversion kinetics of prodrug **17** and linear phosphoramidate analog **5**. The triphosphate was expressed as the percentage of the formation as compared to the highest triphosphate level achieved for each prodrug (n=3). **(B)** Triphosphate measurement of **6** with a sustained level (terminal  $t_{1/2}$  ~20 hours) upon prodrug removal (n=3).

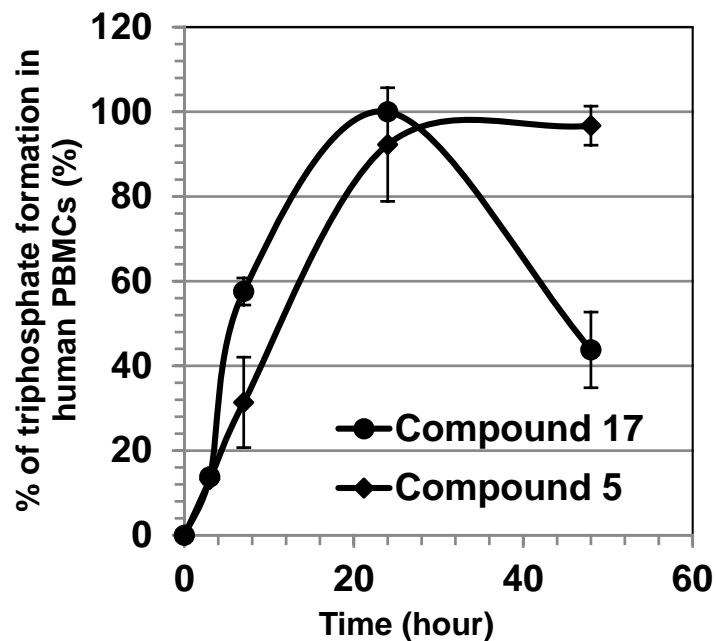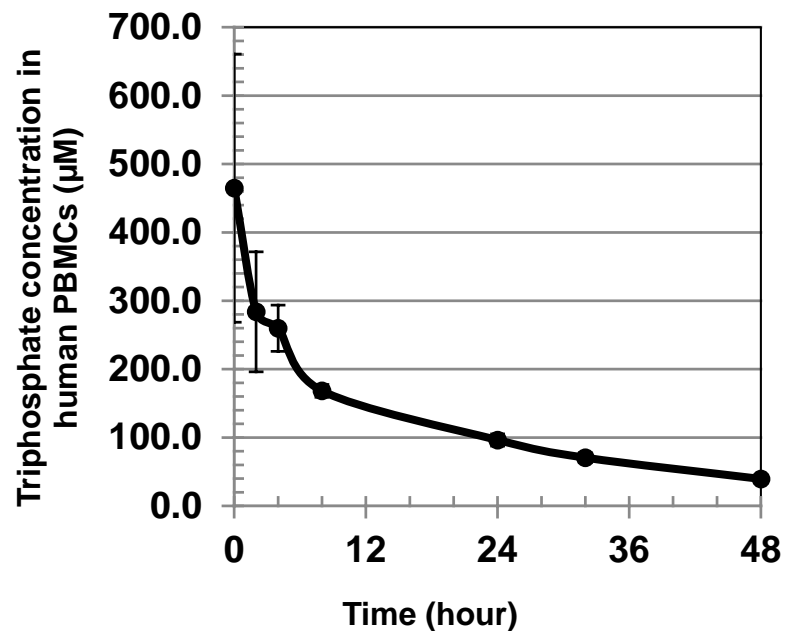

**FIG 5.** Selected prodrugs dosed orally (3 mg/kg) to beagle dogs (n=3). **(A)** Pharmacokinetic profiles of triphosphate metabolites in PBMCs. **(B)** Correlation between the  $C_{max}$  of prodrug in plasma and of triphosphate in PBMCs. **(C)** Correlation between the AUC of prodrug in plasma and of triphosphate in PBMCs.

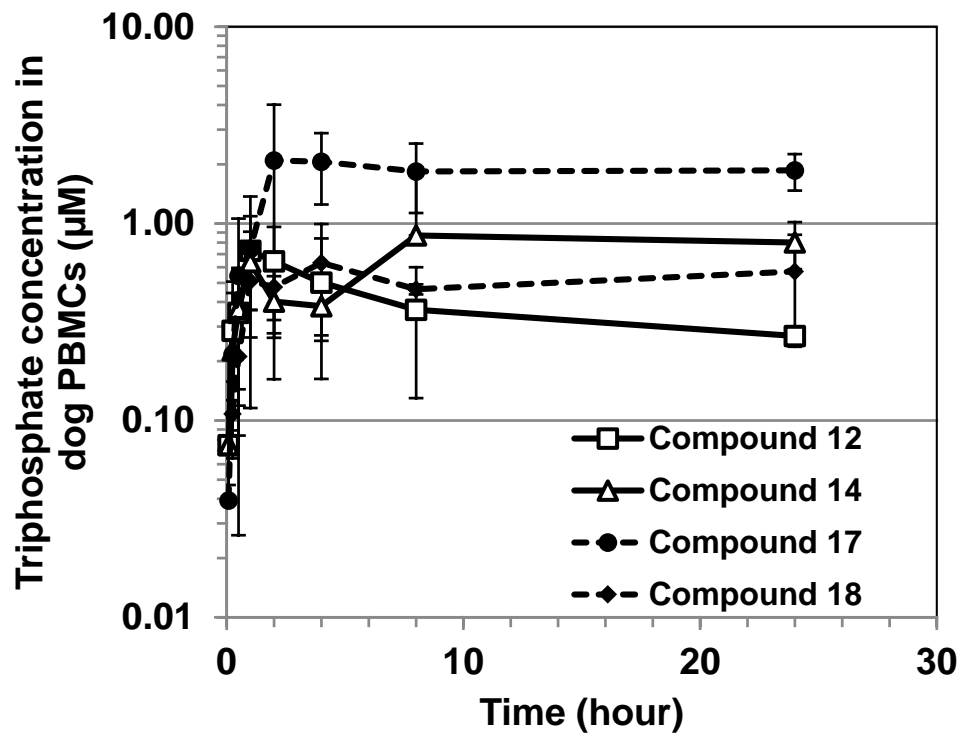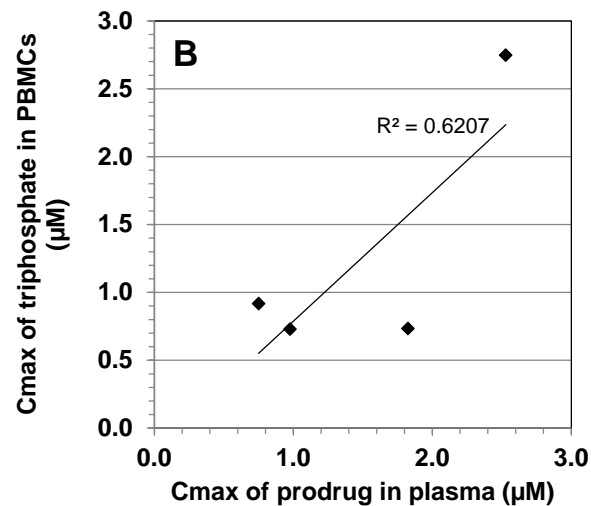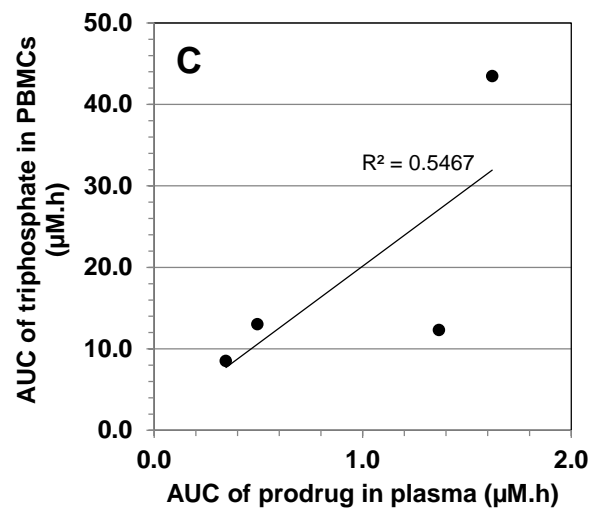

**FIG 6.** Incubation of compound 17 with increasing concentration in human PBMCs to determine  $TP_{50}$ .

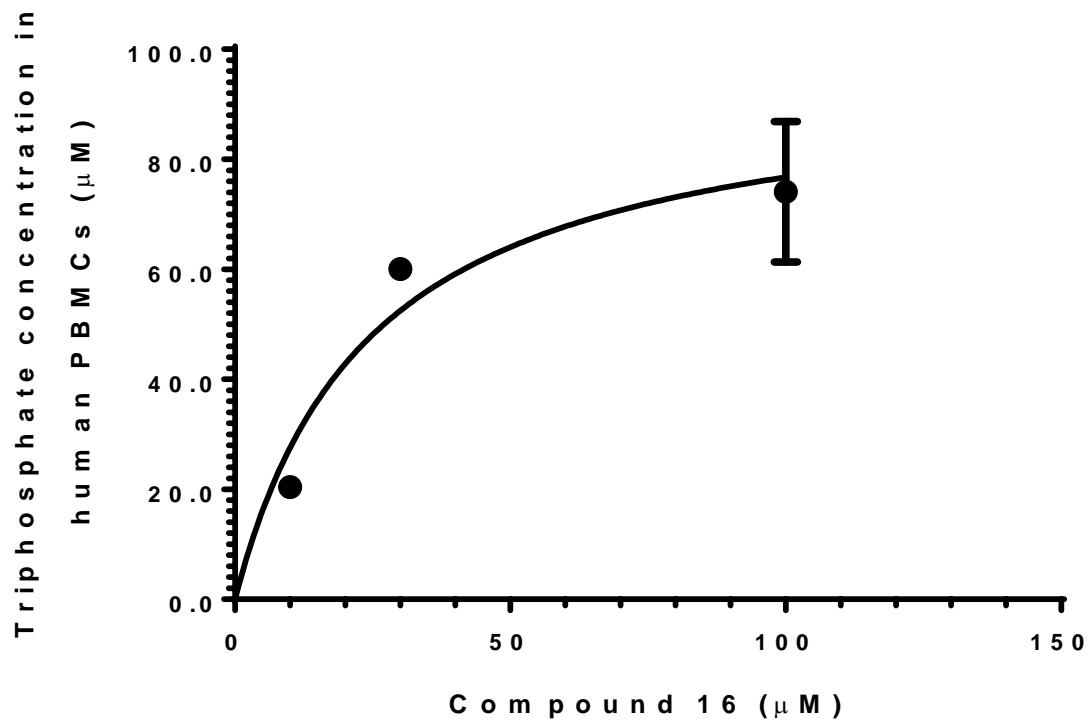

**FIG 7.** Efficacy study in viremia mouse model. Each group contains 6 mice. Compound **17** reduced viremia by 3-, 4-, 28- and 54-folds at 10, 30, 100 and 300 mg/kg twice daily, respectively. The viremia reduction at 100 and 300 mg/kg twice daily are significant ( $p < 0.0001$ ). The difference in the viremia reduction between 30 and 100 or 300 mg/kg twice daily are also significant ( $p < 0.01$  or  $p < 0.0001$ , respectively).

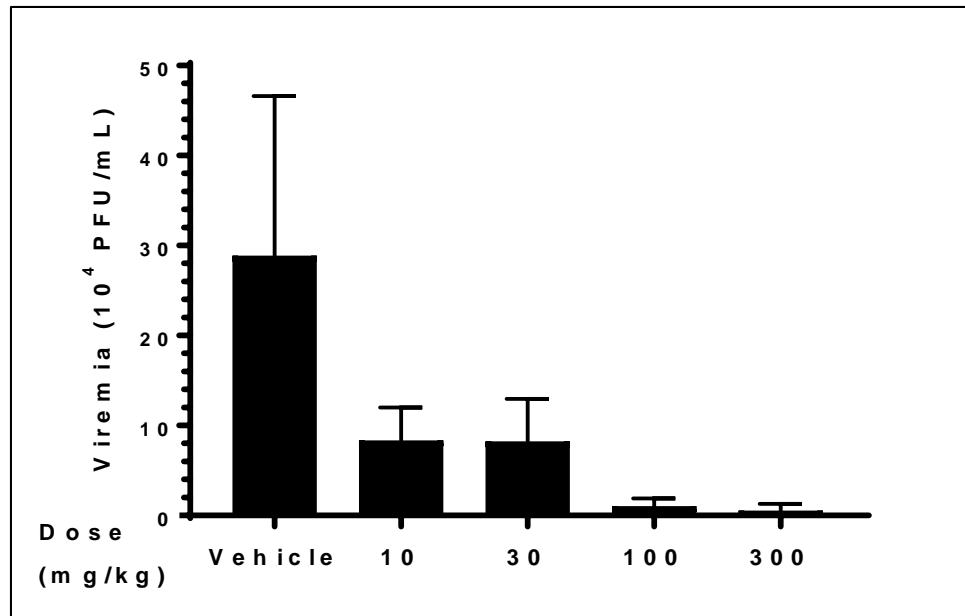

**FIG 8.** Pharmacokinetic profiles of the intact prodrug (**A**) major metabolite nucleoside **7** in plasma (**B**) and triphosphate metabolite **6** in PBMCs (**C**) upon raising doses of compound **17** in beagle dogs (n=3). The triphosphate concentration in PBMCs was determined only from the 10 and 30 mg/kg groups. At 10 mg/kg, the triphosphate level in PBMCs has exceeded TP<sub>50</sub>.

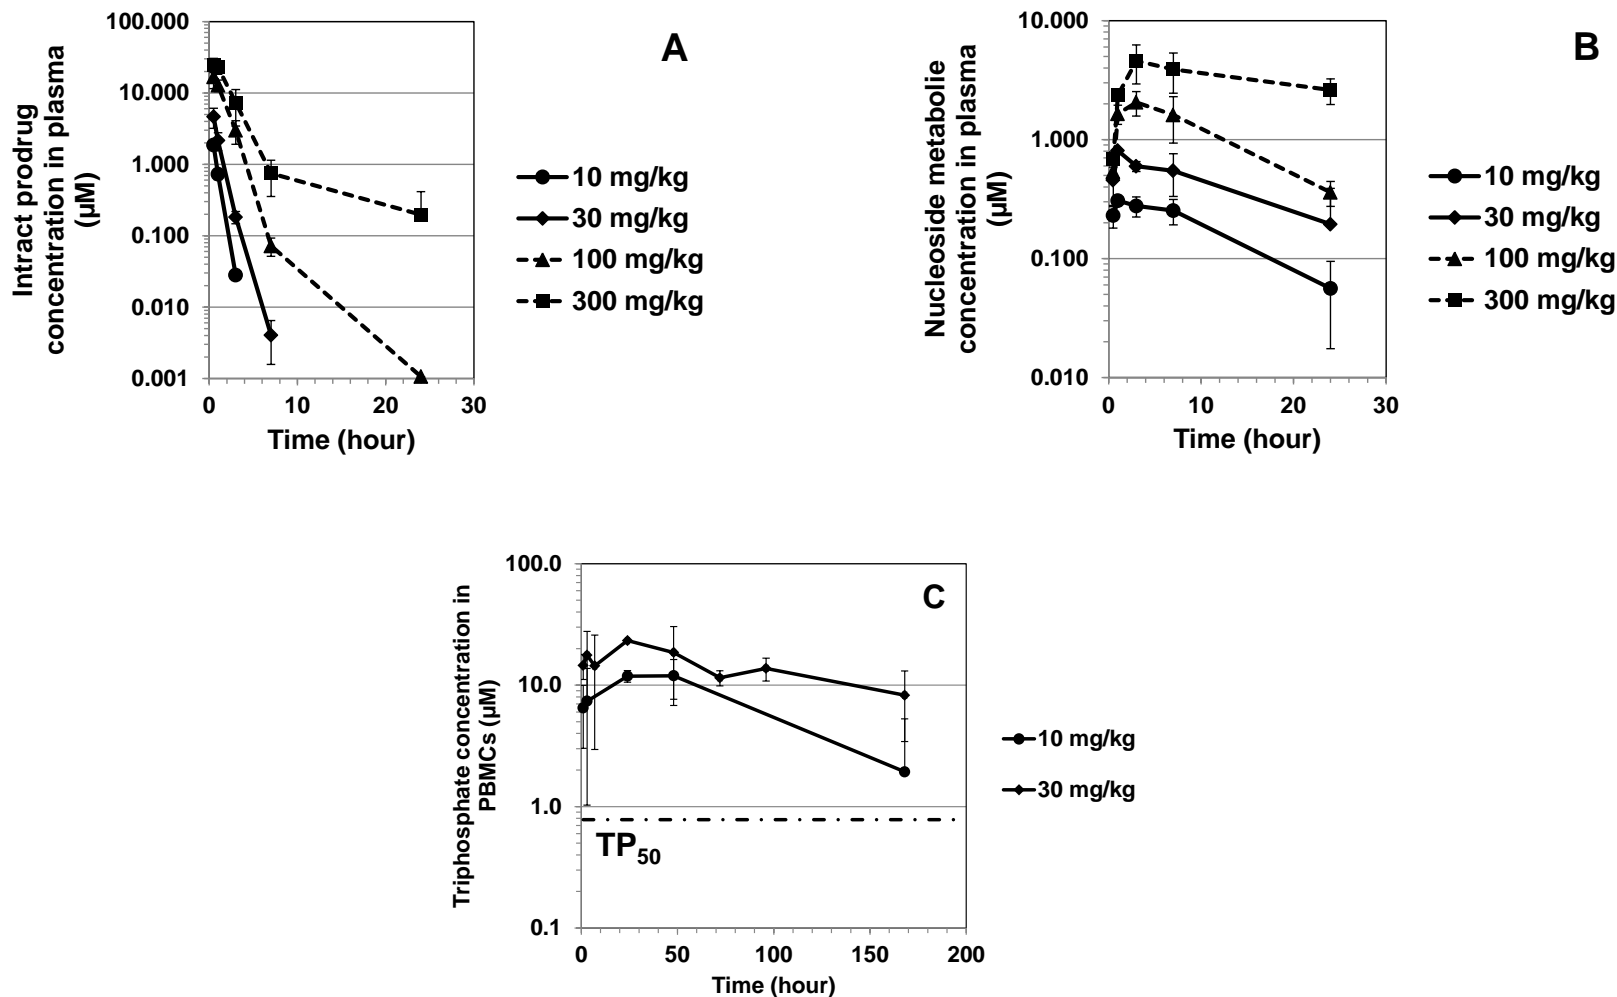

**TABLE 1.** Anti-dengue activity and *in vitro* stability profile of cyclic phosphoramidate prodrugs of 6-O-alkyl-2'-deoxy-2'-fluoro-2'-C-methylguanosine.

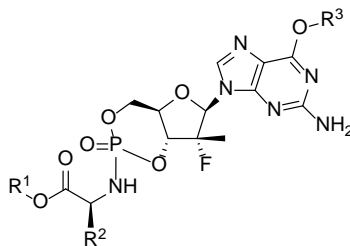

| Compound | R <sup>1</sup> | R <sup>2</sup>      | R <sup>3</sup> | Sp/Rp | PBMC EC <sub>50</sub> (μM) <sup>a</sup> | Plasma T <sub>1/2</sub> (min) human/dog/rat | Liver S9 T <sub>1/2</sub> (min) human/dog | Intestinal S9 T <sub>1/2</sub> (min) human/dog |
|----------|----------------|---------------------|----------------|-------|-----------------------------------------|---------------------------------------------|-------------------------------------------|------------------------------------------------|
| 4        |                |                     |                | Rp    | >25                                     | >120/->120                                  | >120/-                                    | -/-                                            |
| 5        |                |                     |                | Sp    | 0.17                                    | >120/>120/<5                                | 18/51                                     | >120/72                                        |
| 12       | <i>i</i> -Pr   | Me                  | Et             | Sp    | 0.072                                   | >120/>120/<5                                | 36/56                                     | >120/>120                                      |
| 13       | <i>i</i> -Pr   | Me                  | Et             | Rp    | 0.67                                    | >120/>120/<5                                | 63/110                                    | >120/>120                                      |
| 14       | <i>i</i> -Pr   | Me ( <i>R</i> -Ala) | Et             | Sp    | 0.37                                    | >120/>120/6                                 | >120/>120                                 | >120/>120                                      |
| 15       | <i>i</i> -Pr   | Me ( <i>R</i> -Ala) | Et             | Rp    | 1.1                                     | >120/>120/6                                 | 105/73                                    | -/-                                            |
| 16       | <i>i</i> -Pr   | H                   | Et             | Rp    | 0.33                                    | >120/>120/<5                                | 58/91                                     | -/-                                            |
| 17       | Et             | Me                  | Et             | Rp    | 0.23                                    | >120/>120/<5                                | 76/116                                    | >120/>120                                      |
| 18       | Me             | Me                  | Et             | Rp    | 0.46                                    | >120/>120/<5                                | >120/>120                                 | >120/>120                                      |
| 19       | Me             | Me                  | Pr- <i>i</i>   | Rp    | 0.43                                    | 113/>120/<5                                 | >120/>120                                 | -/-                                            |
| 20       | Et             | <i>i</i> -Pr        | Et             | Sp    | 0.23                                    | >120/>120/66                                | 82/61                                     | >120/>120                                      |

<sup>a</sup> DENV-2 plaque assay in human PBMCs.



**TABLE 2.** Prodrug **17** were converted to triphosphate in the PBMCs from multiple species. Data were at least n=3.

| Compound 17,<br>incubation<br>concentration<br>( $\mu\text{M}$ ) | Triphosphate concentration in PBMCs of multiple species ( $\mu\text{M}$ ) |               |                |                 |                 |
|------------------------------------------------------------------|---------------------------------------------------------------------------|---------------|----------------|-----------------|-----------------|
|                                                                  | Mouse                                                                     | Rat           | Dog            | Monkey          | Human           |
| 10                                                               | $8.5 \pm 2.5$                                                             | n.d.          | $2.8 \pm 0.4$  | $39.2 \pm 14.5$ | $15.9 \pm 10.6$ |
| 100                                                              | $53.4 \pm 8.4$                                                            | $8.8 \pm 0.5$ | $13.8 \pm 1.8$ | $22.6 \pm 6.4$  | $59.7 \pm 19.4$ |

*n.d.* = not determined

**TABLE 3.** Pharmacokinetic parameters of selected compounds dosed *i.v.* (0.5 mg/kg) and *p.o.* (3 mg/kg) to beagle dogs (n=3). Intact prodrug and the major metabolite, nucleoside **7**, were monitored in plasma, while the triphosphate metabolite **6** was measured in PBMCs from the *p.o.* study.

| Route       | Unit        | Intact prodrug |      |      |      | Nucleoside 7 (R=H) |     |     |     | Triphosphate 6 |     |      |      |      |
|-------------|-------------|----------------|------|------|------|--------------------|-----|-----|-----|----------------|-----|------|------|------|
| Prodrug     |             | 12             | 14   | 17   | 18   | 12                 | 14  | 17  | 18  | 12             | 14  | 17   | 18   |      |
| <i>i.v.</i> | $V_{dss}$   | L/kg           | 0.4  |      | 0.5  | 0.5                |     |     |     |                |     |      |      |      |
|             | ER*         | %              | >100 | --** | 67   | 45                 |     |     |     |                |     |      |      |      |
|             | $T_{1/2}$   | h              | 0.1  |      | 0.3  | 0.3                | 4.0 | 4.0 | 3.4 | 3.9            |     |      |      |      |
| <i>p.o.</i> | $C_{max}$   | $\mu$ M        | 1.0  | 0.8  | 2.5  | 1.8                | 0.8 | 0.8 | 0.5 | 1.3            | 0.7 | 0.9  | 2.7  | 0.7  |
|             | $T_{max}$   | h              | 0.08 | 0.25 | 0.08 | 0.25               | 0.5 | 0.5 | 2   | 1              | 1.0 | 16   | 11   | 4.7  |
|             | $AUC_{inf}$ | $\mu$ M.h      | 0.3  | 0.5  | 1.6  | 1.4                | 4.4 | 4.4 | 4.6 | 7.1            | 8.5 | 13.0 | 43.5 | 12.3 |
|             | F           | %              | 25   | --*  | 44   | 24                 |     |     |     |                |     |      |      |      |

\*ER = hepatic extraction ratio, obtained from clearance data from the *i.v.* study. Dog liver blood flow of 42 mL/min/kg was used.

\*\**i.v.* study not performed

**TABLE 4.** Activity of compound **17** across multiple serotypes and cell lines

| <b>Assay type</b>                                         | <b>Activity</b> | <b>Units</b> |
|-----------------------------------------------------------|-----------------|--------------|
| PBMC DEN1 48h assay (EC <sub>50</sub> ),                  | 0.18 ± 0.06     | μM           |
| PBMC DEN2 48h assay (EC <sub>50</sub> )                   | 0.23 ± 0.04     | μM           |
| PBMC DEN3 48h assay (EC <sub>50</sub> )                   | 0.36 ± 0.33     | μM           |
| PBMC DEN4 48h assay (EC <sub>50</sub> )                   | 0.37 ± 0.14     | μM           |
| THP-1 DEN2 assay (EC <sub>50</sub> )                      | 0.46 ± 0.20     | μM           |
| KU812 DEN2 high content imaging assay (EC <sub>50</sub> ) | 1.41            | μM           |
| K562 DEN2 assay (EC <sub>50</sub> )                       | 2.79 ± 0.22     | μM           |
| 293T DEN2 assay (EC <sub>50</sub> )                       | 3.40            | μM           |
| Huh-7 DEN2 replicon, luciferase assay (EC <sub>50</sub> ) | 1.73 ± 1.06     | μM           |

**TABLE 5.** Pharmacokinetic parameters (n = 3 animals) upon twice-daily oral dosing of compound **17** in the infected mouse model. The intact prodrug level was not determined. Major metabolite nucleoside **7** was monitored at 1, 3, 6, and 24 hours post 1<sup>st</sup> and 5<sup>th</sup> dose in plasma. Terminal concentration of triphosphate metabolite **6** was measured in pooled PBMCs from the 30 and 100 mg/kg groups.

|                      | Unit | Day | 10 mg/kg | 30 mg/kg |          | 100 mg/kg | 300 mg/kg |          |
|----------------------|------|-----|----------|----------|----------|-----------|-----------|----------|
| Metabolite           |      |     | <b>7</b> | <b>7</b> | <b>6</b> | <b>7</b>  | <b>6</b>  | <b>7</b> |
| C <sub>72</sub>      | μM   | 3   | 0.02     | 0.1      | 0.39     | 0.2       | 1.43      | 1.9      |
| C <sub>max</sub>     | μM   | 1   | 0.3      | 0.9      |          | 2.5       |           | 1.9      |
|                      |      | 3   | 0.3      | 0.8      | --       | 1.4       | --        | 2.4      |
| AUC <sub>inf</sub> * | μM.h | 1   | 2.7      | 7.7      |          | 23.2      |           | 24.4     |
|                      |      | 3   | 3.3      | 9.5      |          | 20.6      |           | 29.6     |

\*AUC<sub>(0-24)</sub> was used for 300 mg/kg group as extrapolation to infinity was over-predicted

**TABLE 6.** Pharmacokinetic parameters of compound **17** dosed p.o. at 15 mg/kg in different formulation to beagle dogs. Solid dispersion formulation has the highest oral bioavailability.

|                    | Unit | Solution | Nanosuspension | Solid dispersion |
|--------------------|------|----------|----------------|------------------|
| C <sub>max</sub>   | μM   | 5.5      | 0.9            | 16.4             |
| T <sub>max</sub>   | h    | 0.58     | 0.8            | 0.25             |
| AUC <sub>inf</sub> | μM.h | 4.4      | 1.5            | 12.2             |
| F                  | %    | 24       | 8.5            | 68               |

**TABLE 7.** Pharmacokinetic parameters of compound **17** dosed p.o. at 10, 30, 100, and 300 mg/kg in solid dispersion formulation to beagle dogs. A trend of dose-proportionality observed.

| Dose                 | Unit  | Intact prodrug |     |      |      | Nucleoside 7 |      |      |       | Triphosphate 6 |        |
|----------------------|-------|----------------|-----|------|------|--------------|------|------|-------|----------------|--------|
|                      | mg/kg | 10             | 30  | 100  | 300  | 10           | 30   | 100  | 300   | 10             | 30     |
| C <sub>max</sub>     | μM    | 1.9            | 4.6 | 17.3 | 24.9 | 0.5          | 1.3  | 3.4  | 7.5   | 13.1           | 22.3   |
| T <sub>max</sub>     | h     | 0.5            | 0.5 | 0.7  | 0.7  | 2.3          | 3.0  | 3.0  | 3.0   | 32             | 9.3    |
| AUC <sub>inf</sub> * | μM.h  | 1.9            | 5.6 | 33.6 | 74.3 | 7.2          | 17.0 | 46.4 | 130.6 | 957.6          | 1879.9 |
| T <sub>1/2</sub>     | h     | 0.4            | 0.7 | 1.1  | 4.7  | 8.9          | 26.9 | 8.6  | 31.1  | 86.6           | 86.6   |

\*AUC<sub>(0-24)</sub> was used for **6** and **7** as the metabolites have very long half-lives and extrapolation to infinity became over-predicted

**TABLE 8.** Triphosphate concentration in PBMCs upon multiple oral dosing of compound **17** in beagle dogs (n = 3 females and 3 males).

|                       | Unit | 30 mg/kg/day |      | 100 mg/kg/day | 300 mg/kg/day |
|-----------------------|------|--------------|------|---------------|---------------|
| Study day             |      | 1            | 14   | 1             | 1             |
| C <sub>24</sub>       | μM   | 24           | 50   | 100           | 73            |
| C <sub>max</sub>      | μM   | 73           | 98   | 140           | 150           |
| AUC <sub>(0-24)</sub> | μM.h | 1050         | 1558 | 2399          | 2387          |
